# Supplementary material for: A new approach to the identification of high-potential materials for cost-efficient membrane-based post-combustion CO2capture
Source: Royal Society of Chemistry journal article supplement (doi:10.1039/c8se00039e), 2018-01-01
Supplement: c8se00039e1.xlsx [file c8se00039e1.xlsx]

## Sheet: Maximum thickness (nm)
	This file presents the maximum membrane material thickness (nm) requirements to develop a membrane module which can result in different cost-reductions level (0, 10, 30, 50%) compared to MEA-based capture for the different cases considered
	(Refinery Fuel Gas, Refinery LS Fuel Oil, Refinery FCC Coke, Cement plant, Steel plant, and coal power plant) and different CO2 capture ratio scenarios (90% or cost-optimal)
	Please note that thicknesses below 100nm are not considered due to the difficulty and low reliability of predicting selectivity and permeance of thin film membranes
					Refinery Fuel Gas								Refinery LS Fuel Oil								Refinery FCC coke								Cement								Steel								Coal power plant
	Type of polymeric material	Polymeric material name	CO2/N2 selectivity [-]	CO2 permeability [Barrer]	On Par		10% cost reduction		30% cost reduction		50% cost reduction		On Par		10% cost reduction		30% cost reduction		50% cost reduction		On Par		10% cost reduction		30% cost reduction		50% cost reduction		On Par		10% cost reduction		30% cost reduction		50% cost reduction		On Par		10% cost reduction		30% cost reduction		50% cost reduction		On Par		10% cost reduction		30% cost reduction
					90% CCR	Optimal CCR	90% CCR	Optimal CCR	90% CCR	Optimal CCR	90% CCR	Optimal CCR	90% CCR	Optimal CCR	90% CCR	Optimal CCR	90% CCR	Optimal CCR	90% CCR	Optimal CCR	90% CCR	Optimal CCR	90% CCR	Optimal CCR	90% CCR	Optimal CCR	90% CCR	Optimal CCR	90% CCR	Optimal CCR	90% CCR	Optimal CCR	90% CCR	Optimal CCR	90% CCR	Optimal CCR	90% CCR	Optimal CCR	90% CCR	Optimal CCR	90% CCR	Optimal CCR	90% CCR	Optimal CCR	90% CCR	Optimal CCR	90% CCR	Optimal CCR	90% CCR
	Poly(4-methyl-1-pentene)	poly(4-methyl-1-pentene) with chloroform as casting solvent	13.6	15	-	-	-	-	-	-	-	-	-	-	-	-	-	-	-	-	-	-	-	-	-	-	-	-	-	-	-	-	-	-	-	-	-	135	-	-	-	-	-	-	-	-	-	-	-
		poly(4-methyl-1-pentene) with p-Xylene as casting solvent	15.8	42.6	-	-	-	-	-	-	-	-	-	-	-	-	-	-	-	-	-	155	-	110	-	-	-	-	-	195	-	135	-	-	-	-	455	455	455	360	-	145	-	-	-	-	-	-	-
		poly(4-methyl-1-pentene) with cis-Decalin as casting solvent	17.4	27.8	-	-	-	-	-	-	-	-	-	-	-	-	-	-	-	-	-	110	-	-	-	-	-	-	-	155	-	105	-	-	-	-	295	295	295	295	-	110	-	-	-	-	-	-	-
	poly(acetylene)	Poly(trimethyl-prop-1-ynyl-silane)	10.6	19000	-	-	-	-	-	-	-	-	-	-	-	-	-	-	-	-	-	10385	-	-	-	-	-	-	-	40085	-	22050	-	-	-	-	-	97235	-	71475	-	23610	-	-	-	-	-	-	-
		Poly(3,3-dimethyl-but-1-yne)	13	560	-	-	-	-	-	-	-	-	-	-	-	-	-	-	-	-	-	1265	-	700	-	-	-	-	-	1775	-	1160	-	270	-	-	-	4455	-	3040	-	1075	-	160	-	-	-	-	-
		Poly(1-(dimethyl-trimethylsilanylmethyl-silanyl)-propyne)	14.8	310	-	-	-	-	-	-	-	-	-	-	-	-	-	-	-	-	-	1060	-	740	-	230	-	-	-	1285	-	890	-	310	-	-	-	3330	-	2280	-	905	-	160	-	-	-	-	-
		Poly(1-[dimethyl-(2-trimethylsilanyl-ethyl)-silanyl]-propyne)	10.7	150	-	-	-	-	-	-	-	-	-	-	-	-	-	-	-	-	-	-	-	-	-	-	-	-	-	320	-	180	-	-	-	-	-	780	-	570	-	185	-	-	-	-	-	-	-
		Poly(trimethyl-(2-prop-1-ynyl-phenyl)-silane)	12.1	290	-	-	-	-	-	-	-	-	-	-	-	-	-	-	-	-	-	470	-	200	-	-	-	-	-	795	-	495	-	-	-	-	-	1915	-	1350	-	460	-	-	-	-	-	-	-
		Poly(1-prop-1-ynyl-2-trifluoromethyl-benzene)	17.8	130	-	-	-	-	-	-	-	-	-	-	-	-	-	-	-	-	-	540	-	375	-	135	-	-	265	755	-	520	-	175	-	-	1395	1395	1395	1395	105	550	-	130	-	-	-	-	-
		Poly(dec-2-yne)	9.3	130	-	-	-	-	-	-	-	-	-	-	-	-	-	-	-	-	-	-	-	-	-	-	-	-	-	-	-	-	-	-	-	-	-	-	-	-	-	-	-	-	-	-	-	-	-
		Poly(1-chloro-dec-1-yne)	10.6	170	-	-	-	-	-	-	-	-	-	-	-	-	-	-	-	-	-	-	-	-	-	-	-	-	-	355	-	195	-	-	-	-	-	870	-	635	-	210	-	-	-	-	-	-	-
		Poly(1-chloro-oct-1-yne)	11.8	130	-	-	-	-	-	-	-	-	-	-	-	-	-	-	-	-	-	185	-	-	-	-	-	-	-	340	-	205	-	-	-	-	-	810	-	575	-	195	-	-	-	-	-	-	-
		Poly(1-chloro-hex-1-yne)	18	180	-	-	-	-	-	-	-	-	-	125	-	-	-	-	-	-	-	760	-	525	-	190	-	-	405	1070	145	735	-	250	-	-	1935	1935	1935	1935	150	775	-	190	-	110	-	-	-
		Poly(hexyl-dimethyl-prop-1-ynyl-silane)	16.5	71	-	-	-	-	-	-	-	-	-	-	-	-	-	-	-	-	-	275	-	195	-	-	-	-	-	355	-	250	-	-	-	-	760	760	760	665	-	260	-	-	-	-	-	-	-
		Poly(trimethyl-(1-pentyl-prop-2-ynyl)-silane)	13.8	120	-	-	-	-	-	-	-	-	-	-	-	-	-	-	-	-	-	335	-	205	-	-	-	-	-	435	-	285	-	-	-	-	-	1165	-	735	-	275	-	-	-	-	-	-	-
		Poly(hexyl-dimethyl-(1-propyl-prop-2-ynyl)-silane)	11.1	70	-	-	-	-	-	-	-	-	-	-	-	-	-	-	-	-	-	-	-	-	-	-	-	-	-	160	-	-	-	-	-	-	-	385	-	280	-	-	-	-	-	-	-	-	-
		Poly(prop-1-ynyl-benzene)	11.4	25	-	-	-	-	-	-	-	-	-	-	-	-	-	-	-	-	-	-	-	-	-	-	-	-	-	-	-	-	-	-	-	-	-	145	-	-	-	-	-	-	-	-	-	-	-
		Poly(but-1-ynyl-benzene)	8.9	40	-	-	-	-	-	-	-	-	-	-	-	-	-	-	-	-	-	-	-	-	-	-	-	-	-	-	-	-	-	-	-	-	-	-	-	-	-	-	-	-	-	-	-	-	-
		Poly(oct-1-ynyl-benzene)	8.7	48	-	-	-	-	-	-	-	-	-	-	-	-	-	-	-	-	-	-	-	-	-	-	-	-	-	-	-	-	-	-	-	-	-	-	-	-	-	-	-	-	-	-	-	-	-
		Poly(chloroethynyl-benzene)	23	23	-	-	-	-	-	-	-	-	-	-	-	-	-	-	-	-	-	155	-	-	-	-	-	-	120	245	-	145	-	-	-	-	245	245	245	245	-	130	-	-	-	-	-	-	-
		Poly(1-ethynyl-2-methyl-benzene)	5	15	-	-	-	-	-	-	-	-	-	-	-	-	-	-	-	-	-	-	-	-	-	-	-	-	-	-	-	-	-	-	-	-	-	-	-	-	-	-	-	-	-	-	-	-	-
		Poly(dimethyl-phenyl-(1-propyl-prop-2-ynyl)-silane)	21.6	54	-	-	-	-	-	-	-	-	-	-	-	-	-	-	-	-	205	310	-	205	-	-	-	-	260	490	125	310	-	120	-	-	580	580	580	580	-	300	-	-	-	-	-	-	-
	poly(arylene ether)	6FPT–6FBPA	11.6	25.29	-	-	-	-	-	-	-	-	-	-	-	-	-	-	-	-	-	-	-	-	-	-	-	-	-	-	-	-	-	-	-	-	-	150	-	105	-	-	-	-	-	-	-	-	-
		6FPT–BPA	13.5	18.53	-	-	-	-	-	-	-	-	-	-	-	-	-	-	-	-	-	-	-	-	-	-	-	-	-	-	-	-	-	-	-	-	-	165	-	105	-	-	-	-	-	-	-	-	-
		6FPPy–6FBPA	12.32	29.46	-	-	-	-	-	-	-	-	-	-	-	-	-	-	-	-	-	-	-	-	-	-	-	-	-	-	-	-	-	-	-	-	-	200	-	140	-	-	-	-	-	-	-	-	-
		6FPPy–BPA	12.6	21.44	-	-	-	-	-	-	-	-	-	-	-	-	-	-	-	-	-	-	-	-	-	-	-	-	-	-	-	-	-	-	-	-	-	155	-	105	-	-	-	-	-	-	-	-	-
		BPA/IA	22.5	5.4	-	-	-	-	-	-	-	-	-	-	-	-	-	-	-	-	-	-	-	-	-	-	-	-	-	-	-	-	-	-	-	-	-	-	-	-	-	-	-	-	-	-	-	-	-
	polyarylate	BPA/tBIA	20.2	24.2	-	-	-	-	-	-	-	-	-	-	-	-	-	-	-	-	-	115	-	-	-	-	-	-	105	190	-	125	-	-	-	-	260	260	260	260	-	130	-	-	-	-	-	-	-
		HFBPA/IA	17.2	19.1	-	-	-	-	-	-	-	-	-	-	-	-	-	-	-	-	-	-	-	-	-	-	-	-	-	-	-	-	-	-	-	-	205	205	205	200	-	-	-	-	-	-	-	-	-
		HFBPA/tBIA	14.7	56.9	-	-	-	-	-	-	-	-	-	-	-	-	-	-	-	-	-	190	-	130	-	-	-	-	-	230	-	160	-	-	-	-	-	610	-	410	-	160	-	-	-	-	-	-	-
		PhTh/IA	24.1	6.74	-	-	-	-	-	-	-	-	-	-	-	-	-	-	-	-	-	-	-	-	-	-	-	-	-	-	-	-	-	-	-	-	-	-	-	-	-	-	-	-	-	-	-	-	-
		PhTh/tBIA	21.8	23.8	-	-	-	-	-	-	-	-	-	-	-	-	-	-	-	-	-	140	-	-	-	-	-	-	115	220	-	140	-	-	-	-	255	255	255	255	-	130	-	-	-	-	-	-	-
		FBP/IA	12.4	12.4	-	-	-	-	-	-	-	-	-	-	-	-	-	-	-	-	-	-	-	-	-	-	-	-	-	-	-	-	-	-	-	-	-	-	-	-	-	-	-	-	-	-	-	-	-
		FBP/tBIA	19.1	36.8	-	-	-	-	-	-	-	-	-	-	-	-	-	-	-	-	-	165	-	110	-	-	-	-	125	250	-	170	-	-	-	-	395	395	395	395	-	180	-	-	-	-	-	-	-
		TBBPA/IA	27.4	4.93	-	-	-	-	-	-	-	-	-	-	-	-	-	-	-	-	-	-	-	-	-	-	-	-	-	-	-	-	-	-	-	-	-	-	-	-	-	-	-	-	-	-	-	-	-
		TBBPA/tBIA	23.9	21.5	-	-	-	-	-	-	-	-	-	-	-	-	-	-	-	-	-	165	-	-	-	-	-	-	115	230	-	145	-	-	-	-	230	230	230	230	-	125	-	-	-	-	-	-	-
		TBHFBPA/IA	23.9	25.6	-	-	-	-	-	-	-	-	-	-	-	-	-	-	-	-	115	195	-	120	-	-	-	-	140	275	-	175	-	-	-	-	275	275	275	275	-	150	-	-	-	-	-	-	-
		TBHFBPA/tBIA	19	85.1	-	-	-	-	-	-	-	-	-	-	-	-	-	-	-	-	125	380	-	260	-	-	-	-	280	570	115	385	-	135	-	-	915	915	915	915	-	410	-	110	-	-	-	-	-
		TBPhTh/IA	28.8	8.34	-	-	-	-	-	-	-	-	-	-	-	-	-	-	-	-	-	-	-	-	-	-	-	-	-	-	-	-	-	-	-	-	-	-	-	-	-	-	-	-	-	-	-	-	-
		TBPhTh/tBIA	23.9	30.6	-	-	-	-	-	-	-	-	-	-	-	-	-	-	-	-	140	235	-	145	-	-	-	-	165	325	-	210	-	-	-	-	325	325	325	325	-	175	-	-	-	-	-	-	-
		TBFBP/IA	29.1	20.4	-	-	-	-	-	-	-	-	-	-	-	-	-	-	-	-	110	215	-	140	-	-	-	-	210	215	105	180	-	-	-	-	215	215	215	215	-	125	-	-	-	-	-	-	-
		TBFBP/tBIA	23.6	69.5	-	-	-	-	-	-	-	-	-	-	-	-	-	-	-	-	310	515	150	320	-	125	-	-	380	745	195	465	-	185	-	-	745	745	745	745	120	400	-	130	-	-	-	-	-
		DMBPA/IA	19.7	1.24	-	-	-	-	-	-	-	-	-	-	-	-	-	-	-	-	-	-	-	-	-	-	-	-	-	-	-	-	-	-	-	-	-	-	-	-	-	-	-	-	-	-	-	-	-
		DMBPA/tBIA	20.5	8	-	-	-	-	-	-	-	-	-	-	-	-	-	-	-	-	-	-	-	-	-	-	-	-	-	-	-	-	-	-	-	-	-	-	-	-	-	-	-	-	-	-	-	-	-
		TMBPA/IA	20.7	12	-	-	-	-	-	-	-	-	-	-	-	-	-	-	-	-	-	-	-	-	-	-	-	-	-	-	-	-	-	-	-	-	125	125	125	125	-	-	-	-	-	-	-	-	-
		TMBPA/tBIA	17.7	44.6	-	-	-	-	-	-	-	-	-	-	-	-	-	-	-	-	-	185	-	125	-	-	-	-	-	255	-	175	-	-	-	-	475	475	475	475	-	185	-	-	-	-	-	-	-
		DiisoBPA/IA	19.1	5.16	-	-	-	-	-	-	-	-	-	-	-	-	-	-	-	-	-	-	-	-	-	-	-	-	-	-	-	-	-	-	-	-	-	-	-	-	-	-	-	-	-	-	-	-	-
		DiisoBPA/tBIA	14.9	16.1	-	-	-	-	-	-	-	-	-	-	-	-	-	-	-	-	-	-	-	-	-	-	-	-	-	-	-	-	-	-	-	-	-	170	-	120	-	-	-	-	-	-	-	-	-
		DBDMBPA/IA	24.8	5.45	-	-	-	-	-	-	-	-	-	-	-	-	-	-	-	-	-	-	-	-	-	-	-	-	-	-	-	-	-	-	-	-	-	-	-	-	-	-	-	-	-	-	-	-	-
		PhAnth/IA	25	9	-	-	-	-	-	-	-	-	-	-	-	-	-	-	-	-	-	-	-	-	-	-	-	-	-	-	-	-	-	-	-	-	-	-	-	-	-	-	-	-	-	-	-	-	-
		PhAnth/tBIA	19.2	25.9	-	-	-	-	-	-	-	-	-	-	-	-	-	-	-	-	-	115	-	-	-	-	-	-	-	175	-	120	-	-	-	-	275	275	275	275	-	125	-	-	-	-	-	-	-
		FBP/IA	21.8	12.4	-	-	-	-	-	-	-	-	-	-	-	-	-	-	-	-	-	-	-	-	-	-	-	-	-	115	-	-	-	-	-	-	130	130	130	130	-	-	-	-	-	-	-	-	-
		FBP/tBIA	19.1	36.8	-	-	-	-	-	-	-	-	-	-	-	-	-	-	-	-	-	165	-	110	-	-	-	-	125	250	-	170	-	-	-	-	395	395	395	395	-	180	-	-	-	-	-	-	-
	polycarbonates	PC	19.7	6.5	-	-	-	-	-	-	-	-	-	-	-	-	-	-	-	-	-	-	-	-	-	-	-	-	-	-	-	-	-	-	-	-	-	-	-	-	-	-	-	-	-	-	-	-	-
		TMPC	16.1	17.58	-	-	-	-	-	-	-	-	-	-	-	-	-	-	-	-	-	-	-	-	-	-	-	-	-	-	-	-	-	-	-	-	185	185	185	155	-	-	-	-	-	-	-	-	-
		TCPC	18.5	6.66	-	-	-	-	-	-	-	-	-	-	-	-	-	-	-	-	-	-	-	-	-	-	-	-	-	-	-	-	-	-	-	-	-	-	-	-	-	-	-	-	-	-	-	-	-
		TBPC	23.2	4.23	-	-	-	-	-	-	-	-	-	-	-	-	-	-	-	-	-	-	-	-	-	-	-	-	-	-	-	-	-	-	-	-	-	-	-	-	-	-	-	-	-	-	-	-	-
		HFPC	15	24	-	-	-	-	-	-	-	-	-	-	-	-	-	-	-	-	-	-	-	-	-	-	-	-	-	-	-	-	-	-	-	-	175	255	-	180	-	-	-	-	-	-	-	-	-
		TMHFPC	15	111	-	-	-	-	-	-	-	-	-	-	-	-	-	-	-	-	-	395	-	280	-	-	-	-	-	470	-	330	-	115	-	-	820	1190	375	850	-	335	-	-	-	-	-	-	-
		NBPC	19.4	9.1	-	-	-	-	-	-	-	-	-	-	-	-	-	-	-	-	-	-	-	-	-	-	-	-	-	-	-	-	-	-	-	-	-	-	-	-	-	-	-	-	-	-	-	-	-
		PCZ	21	2.2	-	-	-	-	-	-	-	-	-	-	-	-	-	-	-	-	-	-	-	-	-	-	-	-	-	-	-	-	-	-	-	-	-	-	-	-	-	-	-	-	-	-	-	-	-
		PC–AP	26.3	9.48	-	-	-	-	-	-	-	-	-	-	-	-	-	-	-	-	-	-	-	-	-	-	-	-	-	-	-	-	-	-	-	-	-	-	-	-	-	-	-	-	-	-	-	-	-
		FBPC	25.5	15.1	-	-	-	-	-	-	-	-	-	-	-	-	-	-	-	-	-	145	-	-	-	-	-	-	-	160	-	115	-	-	-	-	160	160	160	160	-	-	-	-	-	-	-	-	-
	poly(ethylene oxide)	PEO	55	13	-	-	-	-	-	-	-	-	-	-	-	-	-	-	-	-	135	135	120	130	-	-	-	-	135	135	135	135	-	-	-	-	135	135	135	135	-	-	-	-	-	-	-	-	-
		EO/EM/AGE (80/20/2)	46	773	320	660	-	390	-	-	-	-	765	2010	430	1315	-	360	-	-	8315	8315	6935	7395	1535	2550	-	745	8315	8320	8330	8315	2160	2925	-	900	8320	8320	8320	8320	5130	5385	1095	1730	155	1750	-	1040	-
		EO/EM/AGE (77/23/2.3)	44	680	250	545	-	335	-	-	-	-	675	1720	365	1110	-	275	-	-	7315	7315	5915	6400	1175	2235	-	650	7315	7315	7205	7315	1805	2570	-	790	7315	7320	7315	7315	4480	4700	910	1515	-	1535	-	895	-
		EO/EM/AGE (96/4/2.5)	48	580	255	570	-	300	-	-	-	-	570	1535	335	1010	-	295	-	-	6240	6240	5295	5620	1260	1915	-	565	6240	6240	6235	6240	1680	2200	-	675	6240	6240	6240	6240	3875	4070	840	1300	120	1315	-	785	-
	polyimides	PMDA–BAPHF	17.8	11.8	-	-	-	-	-	-	-	-	-	-	-	-	-	-	-	-	-	-	-	-	-	-	-	-	-	-	-	-	-	-	-	-	125	125	125	125	-	-	-	-	-	-	-	-	-
		PMDA–3BAPHF	21.1	6.12	-	-	-	-	-	-	-	-	-	-	-	-	-	-	-	-	-	-	-	-	-	-	-	-	-	-	-	-	-	-	-	-	-	-	-	-	-	-	-	-	-	-	-	-	-
		PMDA–4,4_x0003_-ODA	23.3	1.14	-	-	-	-	-	-	-	-	-	-	-	-	-	-	-	-	-	-	-	-	-	-	-	-	-	-	-	-	-	-	-	-	-	-	-	-	-	-	-	-	-	-	-	-	-
		PMDA–4,4_x0003_-ODA	27.1	2.71	-	-	-	-	-	-	-	-	-	-	-	-	-	-	-	-	-	-	-	-	-	-	-	-	-	-	-	-	-	-	-	-	-	-	-	-	-	-	-	-	-	-	-	-	-
		PMDA–3,3_x0003_-ODA	27.8	0.5	-	-	-	-	-	-	-	-	-	-	-	-	-	-	-	-	-	-	-	-	-	-	-	-	-	-	-	-	-	-	-	-	-	-	-	-	-	-	-	-	-	-	-	-	-
		PMDA–4,4_x0003_-ODA	26	1.18	-	-	-	-	-	-	-	-	-	-	-	-	-	-	-	-	-	-	-	-	-	-	-	-	-	-	-	-	-	-	-	-	-	-	-	-	-	-	-	-	-	-	-	-	-
		PMDA–3,3_x0003_-ODA	24.5	3.55	-	-	-	-	-	-	-	-	-	-	-	-	-	-	-	-	-	-	-	-	-	-	-	-	-	-	-	-	-	-	-	-	-	-	-	-	-	-	-	-	-	-	-	-	-
		PMDA–MDA	20.2	4.03	-	-	-	-	-	-	-	-	-	-	-	-	-	-	-	-	-	-	-	-	-	-	-	-	-	-	-	-	-	-	-	-	-	-	-	-	-	-	-	-	-	-	-	-	-
		PMDA–IPDA	19.8	29.7	-	-	-	-	-	-	-	-	-	-	-	-	-	-	-	-	-	140	-	-	-	-	-	-	120	220	-	145	-	-	-	-	315	315	315	315	-	155	-	-	-	-	-	-	-
		PMDA–BAPHF	18.7	17.6	-	-	-	-	-	-	-	-	-	-	-	-	-	-	-	-	-	-	-	-	-	-	-	-	-	110	-	-	-	-	-	-	185	185	185	185	-	-	-	-	-	-	-	-	-
		PMDA–BATPHF	16.4	24.6	-	-	-	-	-	-	-	-	-	-	-	-	-	-	-	-	-	-	-	-	-	-	-	-	-	120	-	-	-	-	-	-	260	260	260	225	-	-	-	-	-	-	-	-	-
		BPDA–BAPHF	20.2	4.95	-	-	-	-	-	-	-	-	-	-	-	-	-	-	-	-	-	-	-	-	-	-	-	-	-	-	-	-	-	-	-	-	-	-	-	-	-	-	-	-	-	-	-	-	-
		BPDA–BATPHF	16.3	9.15	-	-	-	-	-	-	-	-	-	-	-	-	-	-	-	-	-	-	-	-	-	-	-	-	-	-	-	-	-	-	-	-	-	-	-	-	-	-	-	-	-	-	-	-	-
		BPDA–BAHF	19.9	27.7	-	-	-	-	-	-	-	-	-	-	-	-	-	-	-	-	-	130	-	-	-	-	-	-	115	210	-	140	-	-	-	-	295	295	295	295	-	145	-	-	-	-	-	-	-
		BPDA–BAFL	37.7	23	-	-	-	-	-	-	-	-	-	-	-	-	-	-	-	-	245	245	160	200	-	-	-	-	245	245	220	240	-	-	-	-	245	245	245	245	145	150	-	-	-	-	-	-	-
		BPDA–mTrMPD	16.3	137	-	-	-	-	-	-	-	-	-	-	-	-	-	-	-	-	-	525	-	370	-	125	-	-	105	670	-	470	-	160	-	-	1470	1470	1470	1245	-	500	-	-	-	-	-	-	-
		BTDA–4,4_x0003_-ODA	26.5	0.625	-	-	-	-	-	-	-	-	-	-	-	-	-	-	-	-	-	-	-	-	-	-	-	-	-	-	-	-	-	-	-	-	-	-	-	-	-	-	-	-	-	-	-	-	-
		BTDA–BAPHF	22.4	4.37	-	-	-	-	-	-	-	-	-	-	-	-	-	-	-	-	-	-	-	-	-	-	-	-	-	-	-	-	-	-	-	-	-	-	-	-	-	-	-	-	-	-	-	-	-
		BTDA–BATPHF	18.8	6.94	-	-	-	-	-	-	-	-	-	-	-	-	-	-	-	-	-	-	-	-	-	-	-	-	-	-	-	-	-	-	-	-	-	-	-	-	-	-	-	-	-	-	-	-	-
		BTDA–BAHF	22.4	10.1	-	-	-	-	-	-	-	-	-	-	-	-	-	-	-	-	-	-	-	-	-	-	-	-	-	-	-	-	-	-	-	-	105	105	105	105	-	-	-	-	-	-	-	-	-
		BTDA–mTrMPD	19.9	30.9	-	-	-	-	-	-	-	-	-	-	-	-	-	-	-	-	-	145	-	-	-	-	-	-	130	235	-	155	-	-	-	-	330	330	330	330	-	165	-	-	-	-	-	-	-
		BTDA–BAFL	38.5	15	-	-	-	-	-	-	-	-	-	-	-	-	-	-	-	-	160	160	105	130	-	-	-	-	160	160	145	160	-	-	-	-	160	160	160	160	-	-	-	-	-	-	-	-	-
		PI	31.7	2	-	-	-	-	-	-	-	-	-	-	-	-	-	-	-	-	-	-	-	-	-	-	-	-	-	-	-	-	-	-	-	-	-	-	-	-	-	-	-	-	-	-	-	-	-
		oMeCat–durene	33	27	-	-	-	-	-	-	-	-	-	-	-	-	-	-	-	-	225	290	125	210	-	-	-	-	290	290	195	265	-	-	-	-	290	290	290	290	160	175	-	-	-	-	-	-	-
		mMeCat–durene	34	20	-	-	-	-	-	-	-	-	-	-	-	-	-	-	-	-	200	215	105	160	-	-	-	-	215	215	160	200	-	-	-	-	215	215	215	215	120	130	-	-	-	-	-	-	-
		DMeCat–durene	63	31	-	-	-	-	-	-	-	-	-	-	-	-	-	-	-	-	330	330	305	320	-	-	-	-	330	330	330	330	-	115	-	-	330	330	330	330	215	225	-	-	-	-	-	-	-
		mtBuCat–durene	28	71	-	-	-	-	-	-	-	-	-	-	-	-	-	-	-	-	385	760	215	455	-	180	-	-	605	760	315	605	-	235	-	-	760	760	760	760	300	440	-	145	-	-	-	-	-
		oMeptBuCat–durene	27	67	-	-	-	-	-	-	-	-	-	-	-	-	-	-	-	-	355	720	195	405	-	160	-	-	490	720	260	545	-	215	-	-	720	720	720	720	245	410	-	135	-	-	-	-	-
		TMeCat–durene	25	200	-	115	-	-	-	-	-	-	-	245	-	150	-	-	-	-	1020	1840	540	1100	-	420	-	-	1140	2150	645	1525	160	605	-	145	2150	2150	2150	2150	440	1195	-	395	-	180	-	-	-
		mMetCat–MDA	34	22	-	-	-	-	-	-	-	-	-	-	-	-	-	-	-	-	220	235	115	175	-	-	-	-	235	235	175	220	-	-	-	-	235	235	235	235	130	140	-	-	-	-	-	-	-
		mtBuCat–MDA	29	63	-	-	-	-	-	-	-	-	-	-	-	-	-	-	-	-	345	675	200	425	-	170	-	-	645	675	320	555	-	215	-	-	675	675	675	675	310	395	-	130	-	-	-	-	-
		TMeCat–MDA	30	110	-	-	-	-	-	-	-	-	-	145	-	-	-	-	-	-	610	1180	370	795	-	310	-	-	1180	1180	635	1015	115	385	-	110	1180	1180	1180	1180	615	700	-	235	-	175	-	-	-
		TMeCat–TMB	33	39	-	-	-	-	-	-	-	-	-	-	-	-	-	-	-	-	325	415	180	305	-	115	-	-	415	415	285	380	-	140	-	-	415	415	415	415	230	250	-	-	-	-	-	-	-
		DBuCat–TMB	19	95	-	-	-	-	-	-	-	-	-	-	-	-	-	-	-	-	140	425	-	290	-	105	-	-	315	635	130	430	-	150	-	-	1020	1020	1020	1020	110	455	-	120	-	-	-	-	-
		mtBuCat–DMOB	32	6.7	-	-	-	-	-	-	-	-	-	-	-	-	-	-	-	-	-	-	-	-	-	-	-	-	-	-	-	-	-	-	-	-	-	-	-	-	-	-	-	-	-	-	-	-	-
		TMeCat–6FiPDA	28	54	-	-	-	-	-	-	-	-	-	-	-	-	-	-	-	-	290	580	165	345	-	135	-	-	460	580	240	460	-	175	-	-	580	580	580	580	225	335	-	110	-	-	-	-	-
		6F	19.6	114	-	-	-	-	-	-	-	-	-	-	-	-	-	-	-	-	295	530	-	360	-	135	-	-	450	830	190	555	-	195	-	-	1225	1225	1225	1225	155	590	-	165	-	-	-	-	-
		TMMPD	17.1	600	-	-	-	-	-	-	-	-	-	340	-	130	-	-	-	-	-	2410	-	1690	-	590	-	-	925	3245	-	2255	-	755	-	105	6455	6455	6455	6200	310	2365	-	515	-	335	-	-	-
		IMDDM	18.1	196	-	-	-	-	-	-	-	-	-	135	-	-	-	-	-	-	-	835	-	575	-	210	-	-	460	1180	165	810	-	275	-	-	2105	2105	2105	2105	170	855	-	210	-	125	-	-	-
		ODA	25.8	25	-	-	-	-	-	-	-	-	-	-	-	-	-	-	-	-	130	245	-	140	-	-	-	-	155	265	-	195	-	-	-	-	265	265	265	265	-	150	-	-	-	-	-	-	-
		Matrimid 5218	25.6	6.5	-	-	-	-	-	-	-	-	-	-	-	-	-	-	-	-	-	-	-	-	-	-	-	-	-	-	-	-	-	-	-	-	-	-	-	-	-	-	-	-	-	-	-	-	-
	polyimide 6FDA.	6FDA–pPDA	19.12	15.3	-	-	-	-	-	-	-	-	-	-	-	-	-	-	-	-	-	-	-	-	-	-	-	-	-	-	-	-	-	-	-	-	160	160	160	160	-	-	-	-	-	-	-	-	-
		6FDA–pDiMPDA	16	42.7	-	-	-	-	-	-	-	-	-	-	-	-	-	-	-	-	-	160	-	115	-	-	-	-	-	200	-	140	-	-	-	-	455	455	455	370	-	150	-	-	-	-	-	-	-
		6FDA–durene	12.4	440	-	-	-	-	-	-	-	-	-	-	-	-	-	-	-	-	-	810	-	385	-	-	-	-	-	1265	-	805	-	140	-	-	-	3080	-	2150	-	745	-	-	-	-	-	-	-
		6FDA–durene	12.85	456	-	-	-	-	-	-	-	-	-	-	-	-	-	-	-	-	-	990	-	525	-	-	-	-	-	1410	-	915	-	200	-	-	-	3505	-	2410	-	850	-	120	-	-	-	-	-
		6FDA–mPDA	20.6	9.2	-	-	-	-	-	-	-	-	-	-	-	-	-	-	-	-	-	-	-	-	-	-	-	-	-	-	-	-	-	-	-	-	-	-	-	-	-	-	-	-	-	-	-	-	-
		6FDA–mPDA	22.7	8.23	-	-	-	-	-	-	-	-	-	-	-	-	-	-	-	-	-	-	-	-	-	-	-	-	-	-	-	-	-	-	-	-	-	-	-	-	-	-	-	-	-	-	-	-	-
		6FDA–mMPDA	17.9	40.1	-	-	-	-	-	-	-	-	-	-	-	-	-	-	-	-	-	165	-	115	-	-	-	-	-	235	-	160	-	-	-	-	430	430	430	430	-	170	-	-	-	-	-	-	-
		6FDA–mMPDA	20.1	42.52	-	-	-	-	-	-	-	-	-	-	-	-	-	-	-	-	140	205	-	135	-	-	-	-	185	330	-	220	-	-	-	-	455	455	455	455	-	230	-	-	-	-	-	-	-
		6FDA–mTrMPDA	13.6	431	-	-	-	-	-	-	-	-	-	-	-	-	-	-	-	-	-	1165	-	695	-	-	-	-	-	1515	-	1000	-	280	-	-	-	3965	-	2560	-	950	-	155	-	-	-	-	-
		6FDA–DATr	21.9	28.63	-	-	-	-	-	-	-	-	-	-	-	-	-	-	-	-	110	170	-	110	-	-	-	-	140	270	-	165	-	-	-	-	305	305	305	305	-	160	-	-	-	-	-	-	-
		6FDA–DBTF	18.5	21.64	-	-	-	-	-	-	-	-	-	-	-	-	-	-	-	-	-	-	-	-	-	-	-	-	-	135	-	-	-	-	-	-	230	230	230	230	-	-	-	-	-	-	-	-	-
		6FDA–PHDoeP	1.91	8.59	-	-	-	-	-	-	-	-	-	-	-	-	-	-	-	-	-	-	-	-	-	-	-	-	-	-	-	-	-	-	-	-	-	-	-	-	-	-	-	-	-	-	-	-	-
		6FDA–PPDoeP	13.4	15.05	-	-	-	-	-	-	-	-	-	-	-	-	-	-	-	-	-	-	-	-	-	-	-	-	-	-	-	-	-	-	-	-	-	130	-	-	-	-	-	-	-	-	-	-	-
		6FDA–PMDoeP	26.4	4.78	-	-	-	-	-	-	-	-	-	-	-	-	-	-	-	-	-	-	-	-	-	-	-	-	-	-	-	-	-	-	-	-	-	-	-	-	-	-	-	-	-	-	-	-	-
		6FDA–PEPE	27	6.88	-	-	-	-	-	-	-	-	-	-	-	-	-	-	-	-	-	-	-	-	-	-	-	-	-	-	-	-	-	-	-	-	-	-	-	-	-	-	-	-	-	-	-	-	-
		6FDA–PBEPE	25.3	2.5	-	-	-	-	-	-	-	-	-	-	-	-	-	-	-	-	-	-	-	-	-	-	-	-	-	-	-	-	-	-	-	-	-	-	-	-	-	-	-	-	-	-	-	-	-
		6FDA–PTEPE	22.6	1.94	-	-	-	-	-	-	-	-	-	-	-	-	-	-	-	-	-	-	-	-	-	-	-	-	-	-	-	-	-	-	-	-	-	-	-	-	-	-	-	-	-	-	-	-	-
		6FDA–PMeaP	28	2.41	-	-	-	-	-	-	-	-	-	-	-	-	-	-	-	-	-	-	-	-	-	-	-	-	-	-	-	-	-	-	-	-	-	-	-	-	-	-	-	-	-	-	-	-	-
		6FDA–3,4_x0003_ODA	23.6	6.11	-	-	-	-	-	-	-	-	-	-	-	-	-	-	-	-	-	-	-	-	-	-	-	-	-	-	-	-	-	-	-	-	-	-	-	-	-	-	-	-	-	-	-	-	-
		6FDA–APAP	22.6	10.7	-	-	-	-	-	-	-	-	-	-	-	-	-	-	-	-	-	-	-	-	-	-	-	-	-	110	-	-	-	-	-	-	115	115	115	115	-	-	-	-	-	-	-	-	-
		6FDA–pp_x0003_ODA	22.8	16.7	-	-	-	-	-	-	-	-	-	-	-	-	-	-	-	-	-	110	-	-	-	-	-	-	-	175	-	105	-	-	-	-	175	175	175	175	-	-	-	-	-	-	-	-	-
		6FDA–BAPHF	19.5	19.1	-	-	-	-	-	-	-	-	-	-	-	-	-	-	-	-	-	-	-	-	-	-	-	-	-	135	-	-	-	-	-	-	205	205	205	205	-	-	-	-	-	-	-	-	-
		6FDA–BATPHF	17.5	22.8	-	-	-	-	-	-	-	-	-	-	-	-	-	-	-	-	-	-	-	-	-	-	-	-	-	125	-	-	-	-	-	-	245	245	245	245	-	-	-	-	-	-	-	-	-
		6FDA–BAHF	16.5	51.2	-	-	-	-	-	-	-	-	-	-	-	-	-	-	-	-	-	195	-	140	-	-	-	-	-	255	-	180	-	-	-	-	550	550	550	480	-	190	-	-	-	-	-	-	-
		6FDA–1,5-NDA	21	23	-	-	-	-	-	-	-	-	-	-	-	-	-	-	-	-	-	125	-	-	-	-	-	-	105	195	-	125	-	-	-	-	245	245	245	245	-	125	-	-	-	-	-	-	-
		6FDA–durene 24 h amidation	8.75	11.6	-	-	-	-	-	-	-	-	-	-	-	-	-	-	-	-	-	-	-	-	-	-	-	-	-	-	-	-	-	-	-	-	-	-	-	-	-	-	-	-	-	-	-	-	-
		6FDA–durene/mPDA (50/50)	16.4	84.6	-	-	-	-	-	-	-	-	-	-	-	-	-	-	-	-	-	325	-	230	-	-	-	-	-	420	-	295	-	-	-	-	910	910	910	780	-	310	-	-	-	-	-	-	-
		6FDA–durene/mPDA (50/50) 4 h amidation	16.2	54.9	-	-	-	-	-	-	-	-	-	-	-	-	-	-	-	-	-	205	-	145	-	-	-	-	-	265	-	185	-	-	-	-	590	590	590	490	-	195	-	-	-	-	-	-	-
		6FDA–durene/mPDA (50/50) 6 h amidation	15	49.1	-	-	-	-	-	-	-	-	-	-	-	-	-	-	-	-	-	175	-	120	-	-	-	-	-	205	-	145	-	-	-	-	360	525	165	375	-	150	-	-	-	-	-	-	-
		6FDA–durene/mPDA (50/50) 12 h amidation	15.6	46	-	-	-	-	-	-	-	-	-	-	-	-	-	-	-	-	-	170	-	120	-	-	-	-	-	205	-	145	-	-	-	-	490	490	490	380	-	150	-	-	-	-	-	-	-
		6FDA–durene/mPDA (50/50) 24 h amidation	17.5	36	-	-	-	-	-	-	-	-	-	-	-	-	-	-	-	-	-	145	-	-	-	-	-	-	-	200	-	140	-	-	-	-	385	385	385	385	-	145	-	-	-	-	-	-	-
		6FDA–durene/mPDA (50/50) 48 h amidation	17.8	24.5	-	-	-	-	-	-	-	-	-	-	-	-	-	-	-	-	-	-	-	-	-	-	-	-	-	140	-	-	-	-	-	-	260	260	260	260	-	-	-	-	-	-	-	-	-
		6FDA–FDA/HFBAPP (1/1)	23.4	465	-	230	-	110	-	-	-	-	-	530	-	320	-	-	-	-	2065	3355	995	2120	-	815	-	125	2530	5000	1310	3085	260	1245	-	240	5000	5000	5000	5000	810	2695	-	865	-	400	-	195	-
		6FDA–ODA	27.7	23	-	-	-	-	-	-	-	-	-	-	-	-	-	-	-	-	120	245	-	145	-	-	-	-	185	245	-	190	-	-	-	-	245	245	245	245	-	140	-	-	-	-	-	-	-
		6FDA–4,4-ODA	23.4	22	-	-	-	-	-	-	-	-	-	-	-	-	-	-	-	-	-	155	-	-	-	-	-	-	115	235	-	145	-	-	-	-	235	235	235	235	-	125	-	-	-	-	-	-	-
		6FDA–MDA	23.5	19	-	-	-	-	-	-	-	-	-	-	-	-	-	-	-	-	-	135	-	-	-	-	-	-	-	200	-	125	-	-	-	-	200	200	200	200	-	110	-	-	-	-	-	-	-
		6FDA–4BDAF	19.4	19	-	-	-	-	-	-	-	-	-	-	-	-	-	-	-	-	-	-	-	-	-	-	-	-	-	130	-	-	-	-	-	-	200	200	200	200	-	-	-	-	-	-	-	-	-
		6FDA–3,3_x0003_-ODA	21	2.1	-	-	-	-	-	-	-	-	-	-	-	-	-	-	-	-	-	-	-	-	-	-	-	-	-	-	-	-	-	-	-	-	-	-	-	-	-	-	-	-	-	-	-	-	-
		6FDA–3BDAF	26.3	6.3	-	-	-	-	-	-	-	-	-	-	-	-	-	-	-	-	-	-	-	-	-	-	-	-	-	-	-	-	-	-	-	-	-	-	-	-	-	-	-	-	-	-	-	-	-
		6FDA–IPDA	27.9	24.3	-	-	-	-	-	-	-	-	-	-	-	-	-	-	-	-	130	260	-	155	-	-	-	-	205	260	105	205	-	-	-	-	260	260	260	260	-	150	-	-	-	-	-	-	-
		6FDA–IPDA	23.5	25.6	-	-	-	-	-	-	-	-	-	-	-	-	-	-	-	-	110	185	-	115	-	-	-	-	135	275	-	170	-	-	-	-	275	275	275	275	-	145	-	-	-	-	-	-	-
		6FDA–IPDA	19.7	27.4	-	-	-	-	-	-	-	-	-	-	-	-	-	-	-	-	-	125	-	-	-	-	-	-	110	200	-	135	-	-	-	-	290	290	290	290	-	140	-	-	-	-	-	-	-
		6FDA–DAF	24.1	19.5	-	-	-	-	-	-	-	-	-	-	-	-	-	-	-	-	-	155	-	-	-	-	-	-	105	205	-	135	-	-	-	-	205	205	205	205	-	110	-	-	-	-	-	-	-
		6FDA–DAF	21.3	20.2	-	-	-	-	-	-	-	-	-	-	-	-	-	-	-	-	-	110	-	-	-	-	-	-	-	175	-	110	-	-	-	-	215	215	215	215	-	110	-	-	-	-	-	-	-
		6FDA–DAF	18.5	21.3	-	-	-	-	-	-	-	-	-	-	-	-	-	-	-	-	-	-	-	-	-	-	-	-	-	130	-	-	-	-	-	-	225	225	225	225	-	-	-	-	-	-	-	-	-
		PI-1 1	22.9	32	-	-	-	-	-	-	-	-	-	-	-	-	-	-	-	-	135	215	-	135	-	-	-	-	170	340	-	200	-	-	-	-	340	340	340	340	-	180	-	-	-	-	-	-	-
		PI-3	21.8	360	-	145	-	-	-	-	-	-	-	380	-	225	-	-	-	-	1410	2135	650	1395	-	530	-	-	1765	3375	850	2115	-	820	-	135	3870	3870	3870	3870	590	2025	-	625	-	295	-	140	-
		PI-4	25.8	62	-	-	-	-	-	-	-	-	-	-	-	-	-	-	-	-	320	610	170	355	-	135	-	-	385	665	215	485	-	190	-	-	665	665	665	665	170	375	-	120	-	-	-	-	-
		PI-5	26	190	-	115	-	-	-	-	-	-	-	235	-	145	-	-	-	-	990	1910	535	1100	-	425	-	-	1220	2040	670	1500	160	590	-	150	2040	2040	2040	2040	555	1150	-	380	-	185	-	-	-
		6FDA–BAFL	29.7	98	-	-	-	-	-	-	-	-	-	130	-	-	-	-	-	-	540	1050	325	695	-	270	-	-	1050	1050	550	895	-	340	-	-	1050	1050	1050	1050	535	620	-	205	-	150	-	-	-
	poly(phenylene oxide)	PPS	34.8	1.6	-	-	-	-	-	-	-	-	-	-	-	-	-	-	-	-	-	-	-	-	-	-	-	-	-	-	-	-	-	-	-	-	-	-	-	-	-	-	-	-	-	-	-	-	-
		PDMPO	18.7	65.5	-	-	-	-	-	-	-	-	-	-	-	-	-	-	-	-	-	285	-	195	-	-	-	-	195	420	-	285	-	-	-	-	700	700	700	700	-	305	-	-	-	-	-	-	-
		PDPPO	26.6	39.9	-	-	-	-	-	-	-	-	-	-	-	-	-	-	-	-	210	420	115	235	-	-	-	-	275	425	150	320	-	125	-	-	425	425	425	425	135	240	-	-	-	-	-	-	-
		PDMPO	24.3	90	-	-	-	-	-	-	-	-	-	105	-	-	-	-	-	-	430	740	215	455	-	175	-	-	500	965	270	640	-	255	-	-	965	965	965	965	165	530	-	170	-	-	-	-	-
		PDMPO (20.0% brominated)	24.6	93.6	-	-	-	-	-	-	-	-	-	110	-	-	-	-	-	-	460	805	235	490	-	185	-	-	525	1005	290	685	-	275	-	-	1005	1005	1005	1005	185	555	-	180	-	-	-	-	-
		PDMPO (37.4% brominated)	26.2	97.1	-	-	-	-	-	-	-	-	-	120	-	-	-	-	-	-	510	990	275	565	-	220	-	-	640	1040	350	770	-	305	-	-	1040	1040	1040	1040	295	590	-	195	-	-	-	-	-
		PDMPO (60.0% brominated)	20	159.9	-	-	-	-	-	-	-	-	-	155	-	-	-	-	-	-	535	770	215	510	-	195	-	-	695	1235	295	820	-	295	-	-	1720	1720	1720	1720	245	870	-	255	-	120	-	-	-
	polypyrrole	6FDA–TAB	20.8	54	-	-	-	-	-	-	-	-	-	-	-	-	-	-	-	-	195	285	-	190	-	-	-	-	245	450	110	295	-	110	-	-	580	580	580	580	-	295	-	-	-	-	-	-	-
		6FDA–TADPO	23	27.6	-	-	-	-	-	-	-	-	-	-	-	-	-	-	-	-	115	185	-	120	-	-	-	-	145	295	-	175	-	-	-	-	295	295	295	295	-	155	-	-	-	-	-	-	-
		BBL	46.3	0.12	-	-	-	-	-	-	-	-	-	-	-	-	-	-	-	-	-	-	-	-	-	-	-	-	-	-	-	-	-	-	-	-	-	-	-	-	-	-	-	-	-	-	-	-	-
	polysulfones	PSF	22.4	5.6	-	-	-	-	-	-	-	-	-	-	-	-	-	-	-	-	-	-	-	-	-	-	-	-	-	-	-	-	-	-	-	-	-	-	-	-	-	-	-	-	-	-	-	-	-
		PSF	24.5	4.9	-	-	-	-	-	-	-	-	-	-	-	-	-	-	-	-	-	-	-	-	-	-	-	-	-	-	-	-	-	-	-	-	-	-	-	-	-	-	-	-	-	-	-	-	-
		TMPSF	19.8	21	-	-	-	-	-	-	-	-	-	-	-	-	-	-	-	-	-	-	-	-	-	-	-	-	-	155	-	105	-	-	-	-	225	225	225	225	-	110	-	-	-	-	-	-	-
		HFPSF	17.9	12	-	-	-	-	-	-	-	-	-	-	-	-	-	-	-	-	-	-	-	-	-	-	-	-	-	-	-	-	-	-	-	-	125	125	125	125	-	-	-	-	-	-	-	-	-
		TMHFPSF	18	72	-	-	-	-	-	-	-	-	-	-	-	-	-	-	-	-	-	305	-	210	-	-	-	-	160	425	-	295	-	-	-	-	770	770	770	770	-	310	-	-	-	-	-	-	-
		PSF-F	22.5	4.5	-	-	-	-	-	-	-	-	-	-	-	-	-	-	-	-	-	-	-	-	-	-	-	-	-	-	-	-	-	-	-	-	-	-	-	-	-	-	-	-	-	-	-	-	-
		PSF-O	21.5	4.3	-	-	-	-	-	-	-	-	-	-	-	-	-	-	-	-	-	-	-	-	-	-	-	-	-	-	-	-	-	-	-	-	-	-	-	-	-	-	-	-	-	-	-	-	-
		PSF-P	21.3	6.8	-	-	-	-	-	-	-	-	-	-	-	-	-	-	-	-	-	-	-	-	-	-	-	-	-	-	-	-	-	-	-	-	-	-	-	-	-	-	-	-	-	-	-	-	-
		TMPSF-F	9	5.5	-	-	-	-	-	-	-	-	-	-	-	-	-	-	-	-	-	-	-	-	-	-	-	-	-	-	-	-	-	-	-	-	-	-	-	-	-	-	-	-	-	-	-	-	-
		TMPSF-P	23.2	13.2	-	-	-	-	-	-	-	-	-	-	-	-	-	-	-	-	-	-	-	-	-	-	-	-	-	140	-	-	-	-	-	-	140	140	140	140	-	-	-	-	-	-	-	-	-
		BIPSF	23.3	5.6	-	-	-	-	-	-	-	-	-	-	-	-	-	-	-	-	-	-	-	-	-	-	-	-	-	-	-	-	-	-	-	-	-	-	-	-	-	-	-	-	-	-	-	-	-
		TMBIPSF	31.8	26.3	-	-	-	-	-	-	-	-	-	-	-	-	-	-	-	-	180	280	105	200	-	-	-	-	280	280	175	250	-	-	-	-	280	280	280	280	150	170	-	-	-	-	-	-	-
		1,5-NPSF	28.1	1.6	-	-	-	-	-	-	-	-	-	-	-	-	-	-	-	-	-	-	-	-	-	-	-	-	-	-	-	-	-	-	-	-	-	-	-	-	-	-	-	-	-	-	-	-	-
		2,6-NPSF	29.4	1.5	-	-	-	-	-	-	-	-	-	-	-	-	-	-	-	-	-	-	-	-	-	-	-	-	-	-	-	-	-	-	-	-	-	-	-	-	-	-	-	-	-	-	-	-	-
		2,7-NPSF	24.3	1.8	-	-	-	-	-	-	-	-	-	-	-	-	-	-	-	-	-	-	-	-	-	-	-	-	-	-	-	-	-	-	-	-	-	-	-	-	-	-	-	-	-	-	-	-	-
		DMPSF	23.1	2.1	-	-	-	-	-	-	-	-	-	-	-	-	-	-	-	-	-	-	-	-	-	-	-	-	-	-	-	-	-	-	-	-	-	-	-	-	-	-	-	-	-	-	-	-	-
		HMBIPSF	23.3	25.5	-	-	-	-	-	-	-	-	-	-	-	-	-	-	-	-	110	180	-	115	-	-	-	-	135	270	-	165	-	-	-	-	270	270	270	270	-	145	-	-	-	-	-	-	-
		DMPSF-Z	24.6	1.4	-	-	-	-	-	-	-	-	-	-	-	-	-	-	-	-	-	-	-	-	-	-	-	-	-	-	-	-	-	-	-	-	-	-	-	-	-	-	-	-	-	-	-	-	-
		PSF-AP	29.2	8.12	-	-	-	-	-	-	-	-	-	-	-	-	-	-	-	-	-	-	-	-	-	-	-	-	-	-	-	-	-	-	-	-	-	-	-	-	-	-	-	-	-	-	-	-	-
		FBPSF	28.5	13.8	-	-	-	-	-	-	-	-	-	-	-	-	-	-	-	-	-	145	-	-	-	-	-	-	125	145	-	120	-	-	-	-	145	145	145	145	-	-	-	-	-	-	-	-	-
		PSF-M	25.5	2.8	-	-	-	-	-	-	-	-	-	-	-	-	-	-	-	-	-	-	-	-	-	-	-	-	-	-	-	-	-	-	-	-	-	-	-	-	-	-	-	-	-	-	-	-	-
		TMPSF-M	25	7	-	-	-	-	-	-	-	-	-	-	-	-	-	-	-	-	-	-	-	-	-	-	-	-	-	-	-	-	-	-	-	-	-	-	-	-	-	-	-	-	-	-	-	-	-
		PSF-BPFL	40	10	-	-	-	-	-	-	-	-	-	-	-	-	-	-	-	-	105	105	-	-	-	-	-	-	105	105	-	105	-	-	-	-	105	105	105	105	-	-	-	-	-	-	-	-	-
		3,4_x0003_-PSF	22.7	1.5	-	-	-	-	-	-	-	-	-	-	-	-	-	-	-	-	-	-	-	-	-	-	-	-	-	-	-	-	-	-	-	-	-	-	-	-	-	-	-	-	-	-	-	-	-
		1,3-ADM PSF	21.8	7.2	-	-	-	-	-	-	-	-	-	-	-	-	-	-	-	-	-	-	-	-	-	-	-	-	-	-	-	-	-	-	-	-	-	-	-	-	-	-	-	-	-	-	-	-	-
		2,2-ADM PSF	20.6	9.5	-	-	-	-	-	-	-	-	-	-	-	-	-	-	-	-	-	-	-	-	-	-	-	-	-	-	-	-	-	-	-	-	-	-	-	-	-	-	-	-	-	-	-	-	-
		PSF (6% Br, 92% C CSiMe3)	17.4	36.5	-	-	-	-	-	-	-	-	-	-	-	-	-	-	-	-	-	145	-	-	-	-	-	-	-	200	-	140	-	-	-	-	390	390	390	390	-	145	-	-	-	-	-	-	-
		PSF (3% Br, 47% C CSiMe3)	14.9	18.5	-	-	-	-	-	-	-	-	-	-	-	-	-	-	-	-	-	-	-	-	-	-	-	-	-	-	-	-	-	-	-	-	-	195	-	135	-	-	-	-	-	-	-	-	-
		PSF (21% Br, 77% C CCMe3)	16.6	28.2	-	-	-	-	-	-	-	-	-	-	-	-	-	-	-	-	-	110	-	-	-	-	-	-	-	140	-	-	-	-	-	-	300	300	300	265	-	105	-	-	-	-	-	-	-
		PSF (5% Br, 45% C CCMe3)	18.2	16.4	-	-	-	-	-	-	-	-	-	-	-	-	-	-	-	-	-	-	-	-	-	-	-	-	-	-	-	-	-	-	-	-	175	175	175	175	-	-	-	-	-	-	-	-	-
		PSF	22.4	5.6	-	-	-	-	-	-	-	-	-	-	-	-	-	-	-	-	-	-	-	-	-	-	-	-	-	-	-	-	-	-	-	-	-	-	-	-	-	-	-	-	-	-	-	-	-
		PSF-s-HBTMS	22.2	21	-	-	-	-	-	-	-	-	-	-	-	-	-	-	-	-	-	130	-	-	-	-	-	-	105	205	-	125	-	-	-	-	225	225	225	225	-	115	-	-	-	-	-	-	-
		PSF-o-HBTMS	21.3	70	-	-	-	-	-	-	-	-	-	-	-	-	-	-	-	-	265	390	105	255	-	-	-	-	330	615	155	395	-	150	-	-	750	750	750	750	110	390	-	115	-	-	-	-	-
		PSF-CH2-TMS	18.9	18	-	-	-	-	-	-	-	-	-	-	-	-	-	-	-	-	-	-	-	-	-	-	-	-	-	115	-	-	-	-	-	-	190	190	190	190	-	-	-	-	-	-	-	-	-
		EM3	22	29	-	-	-	-	-	-	-	-	-	-	-	-	-	-	-	-	115	175	-	110	-	-	-	-	140	275	-	170	-	-	-	-	310	310	310	310	-	160	-	-	-	-	-	-	-
		EM2	26	6.2	-	-	-	-	-	-	-	-	-	-	-	-	-	-	-	-	-	-	-	-	-	-	-	-	-	-	-	-	-	-	-	-	-	-	-	-	-	-	-	-	-	-	-	-	-
		EM1	30	4.8	-	-	-	-	-	-	-	-	-	-	-	-	-	-	-	-	-	-	-	-	-	-	-	-	-	-	-	-	-	-	-	-	-	-	-	-	-	-	-	-	-	-	-	-	-
		SM3 (degree of substitution = 2.0)	23	18	-	-	-	-	-	-	-	-	-	-	-	-	-	-	-	-	-	120	-	-	-	-	-	-	-	190	-	115	-	-	-	-	190	190	190	190	-	-	-	-	-	-	-	-	-
		SM3 (degree of substitution = 1.0)	26	10	-	-	-	-	-	-	-	-	-	-	-	-	-	-	-	-	-	-	-	-	-	-	-	-	-	105	-	-	-	-	-	-	105	105	105	105	-	-	-	-	-	-	-	-	-
		SM1	30	5.1	-	-	-	-	-	-	-	-	-	-	-	-	-	-	-	-	-	-	-	-	-	-	-	-	-	-	-	-	-	-	-	-	-	-	-	-	-	-	-	-	-	-	-	-	-
		PPSF	32	3.2	-	-	-	-	-	-	-	-	-	-	-	-	-	-	-	-	-	-	-	-	-	-	-	-	-	-	-	-	-	-	-	-	-	-	-	-	-	-	-	-	-	-	-	-	-
		RM3	14	27	-	-	-	-	-	-	-	-	-	-	-	-	-	-	-	-	-	-	-	-	-	-	-	-	-	-	-	-	-	-	-	-	-	275	-	170	-	-	-	-	-	-	-	-	-
		RM2	11	6.7	-	-	-	-	-	-	-	-	-	-	-	-	-	-	-	-	-	-	-	-	-	-	-	-	-	-	-	-	-	-	-	-	-	-	-	-	-	-	-	-	-	-	-	-	-
		RM1	11	6.9	-	-	-	-	-	-	-	-	-	-	-	-	-	-	-	-	-	-	-	-	-	-	-	-	-	-	-	-	-	-	-	-	-	-	-	-	-	-	-	-	-	-	-	-	-
		HFPSF	17.9	12	-	-	-	-	-	-	-	-	-	-	-	-	-	-	-	-	-	-	-	-	-	-	-	-	-	-	-	-	-	-	-	-	125	125	125	125	-	-	-	-	-	-	-	-	-
		HFPSF-o-HBTMS	18.6	105	-	-	-	-	-	-	-	-	-	-	-	-	-	-	-	-	115	460	-	315	-	115	-	-	300	670	110	455	-	155	-	-	1125	1125	1125	1125	105	480	-	125	-	-	-	-	-
		HFPSF-s-TMS	20	41	-	-	-	-	-	-	-	-	-	-	-	-	-	-	-	-	135	195	-	130	-	-	-	-	175	315	-	210	-	-	-	-	440	440	440	440	-	220	-	-	-	-	-	-	-
		HFPSF-o-TMS	18	84	-	-	-	-	-	-	-	-	-	-	-	-	-	-	-	-	-	355	-	245	-	-	-	-	190	500	-	345	-	115	-	-	900	900	900	900	-	360	-	-	-	-	-	-	-
		HFPSF-TMS	18	110	-	-	-	-	-	-	-	-	-	-	-	-	-	-	-	-	-	465	-	320	-	115	-	-	245	655	-	450	-	150	-	-	1180	1180	1180	1180	-	475	-	115	-	-	-	-	-
		TM6FPSF	18	72	-	-	-	-	-	-	-	-	-	-	-	-	-	-	-	-	-	305	-	210	-	-	-	-	160	425	-	295	-	-	-	-	770	770	770	770	-	310	-	-	-	-	-	-	-
		TM6FPSF-s-TMS	19	96	-	-	-	-	-	-	-	-	-	-	-	-	-	-	-	-	145	430	-	290	-	110	-	-	320	645	130	435	-	150	-	-	1030	1030	1030	1030	110	460	-	125	-	-	-	-	-
		TMPSF-TMS	21.3	32	-	-	-	-	-	-	-	-	-	-	-	-	-	-	-	-	120	175	-	115	-	-	-	-	150	280	-	180	-	-	-	-	340	340	340	340	-	175	-	-	-	-	-	-	-
		TMPSF-s-TMS	21.6	66.3	-	-	-	-	-	-	-	-	-	-	-	-	-	-	-	-	255	380	110	250	-	-	-	-	320	605	150	380	-	145	-	-	710	710	710	710	105	370	-	110	-	-	-	-	-
		TMPSF-HBTMS	21.4	72	-	-	-	-	-	-	-	-	-	-	-	-	-	-	-	-	270	405	110	265	-	-	-	-	340	640	160	410	-	155	-	-	770	770	770	770	115	400	-	120	-	-	-	-	-
	other polymeric dense films.	HQDPA–PDA	37.4	0.598	-	-	-	-	-	-	-	-	-	-	-	-	-	-	-	-	-	-	-	-	-	-	-	-	-	-	-	-	-	-	-	-	-	-	-	-	-	-	-	-	-	-	-	-	-
		HQDPA–PDA	15.3	1.7	-	-	-	-	-	-	-	-	-	-	-	-	-	-	-	-	-	-	-	-	-	-	-	-	-	-	-	-	-	-	-	-	-	-	-	-	-	-	-	-	-	-	-	-	-
		HQDPA–DBA	45.5	0.683	-	-	-	-	-	-	-	-	-	-	-	-	-	-	-	-	-	-	-	-	-	-	-	-	-	-	-	-	-	-	-	-	-	-	-	-	-	-	-	-	-	-	-	-	-
		HQDPA–DBA	16.8	2.1	-	-	-	-	-	-	-	-	-	-	-	-	-	-	-	-	-	-	-	-	-	-	-	-	-	-	-	-	-	-	-	-	-	-	-	-	-	-	-	-	-	-	-	-	-
		HQDPA–MDBA	34.7	1.18	-	-	-	-	-	-	-	-	-	-	-	-	-	-	-	-	-	-	-	-	-	-	-	-	-	-	-	-	-	-	-	-	-	-	-	-	-	-	-	-	-	-	-	-	-
		HQDPA–MDBA	14.8	2.37	-	-	-	-	-	-	-	-	-	-	-	-	-	-	-	-	-	-	-	-	-	-	-	-	-	-	-	-	-	-	-	-	-	-	-	-	-	-	-	-	-	-	-	-	-
		HQDPA–EDBA	29.4	2.26	-	-	-	-	-	-	-	-	-	-	-	-	-	-	-	-	-	-	-	-	-	-	-	-	-	-	-	-	-	-	-	-	-	-	-	-	-	-	-	-	-	-	-	-	-
		HQDPA–EDBA	14.3	4.18	-	-	-	-	-	-	-	-	-	-	-	-	-	-	-	-	-	-	-	-	-	-	-	-	-	-	-	-	-	-	-	-	-	-	-	-	-	-	-	-	-	-	-	-	-
		12H	21.9	4.6	-	-	-	-	-	-	-	-	-	-	-	-	-	-	-	-	-	-	-	-	-	-	-	-	-	-	-	-	-	-	-	-	-	-	-	-	-	-	-	-	-	-	-	-	-
		6H6F	19.5	8.6	-	-	-	-	-	-	-	-	-	-	-	-	-	-	-	-	-	-	-	-	-	-	-	-	-	-	-	-	-	-	-	-	-	-	-	-	-	-	-	-	-	-	-	-	-
		6F6H	21.2	8.9	-	-	-	-	-	-	-	-	-	-	-	-	-	-	-	-	-	-	-	-	-	-	-	-	-	-	-	-	-	-	-	-	-	-	-	-	-	-	-	-	-	-	-	-	-
		12F	17	12.9	-	-	-	-	-	-	-	-	-	-	-	-	-	-	-	-	-	-	-	-	-	-	-	-	-	-	-	-	-	-	-	-	135	135	135	130	-	-	-	-	-	-	-	-	-
		PBK	25.4	3.3	-	-	-	-	-	-	-	-	-	-	-	-	-	-	-	-	-	-	-	-	-	-	-	-	-	-	-	-	-	-	-	-	-	-	-	-	-	-	-	-	-	-	-	-	-
		PBK-S	29.7	3.27	-	-	-	-	-	-	-	-	-	-	-	-	-	-	-	-	-	-	-	-	-	-	-	-	-	-	-	-	-	-	-	-	-	-	-	-	-	-	-	-	-	-	-	-	-
		PBSF	23	10.8	-	-	-	-	-	-	-	-	-	-	-	-	-	-	-	-	-	-	-	-	-	-	-	-	-	115	-	-	-	-	-	-	115	115	115	115	-	-	-	-	-	-	-	-	-
		PPES	34	0.92	-	-	-	-	-	-	-	-	-	-	-	-	-	-	-	-	-	-	-	-	-	-	-	-	-	-	-	-	-	-	-	-	-	-	-	-	-	-	-	-	-	-	-	-	-
		PPESK	18	0.75	-	-	-	-	-	-	-	-	-	-	-	-	-	-	-	-	-	-	-	-	-	-	-	-	-	-	-	-	-	-	-	-	-	-	-	-	-	-	-	-	-	-	-	-	-
	copolymers and polymer blend dense films	6FDA–TAB	19.3	54	-	-	-	-	-	-	-	-	-	-	-	-	-	-	-	-	105	245	-	165	-	-	-	-	195	375	-	255	-	-	-	-	580	580	580	580	-	270	-	-	-	-	-	-	-
		6FDA/PMDA–TAB (50:50)	22.6	15.8	-	-	-	-	-	-	-	-	-	-	-	-	-	-	-	-	-	-	-	-	-	-	-	-	-	160	-	-	-	-	-	-	170	170	170	165	-	-	-	-	-	-	-	-	-
		6FDA/PMDA–TAB (25:75)	31.9	3.13	-	-	-	-	-	-	-	-	-	-	-	-	-	-	-	-	-	-	-	-	-	-	-	-	-	-	-	-	-	-	-	-	-	-	-	-	-	-	-	-	-	-	-	-	-
		6FDA/PMDA–TAB (10/90)	30.8	1.11	-	-	-	-	-	-	-	-	-	-	-	-	-	-	-	-	-	-	-	-	-	-	-	-	-	-	-	-	-	-	-	-	-	-	-	-	-	-	-	-	-	-	-	-	-
		6FDA–TAB/DAM (75/25)	23.8	73.7	-	-	-	-	-	-	-	-	-	-	-	-	-	-	-	-	335	560	165	350	-	135	-	-	405	790	210	505	-	200	-	-	790	790	790	790	130	430	-	135	-	-	-	-	-
		6FDA–TAB/DAM (50/50)	23.5	155	-	-	-	-	-	-	-	-	-	175	-	105	-	-	-	-	690	1130	335	715	-	275	-	-	845	1665	440	1035	-	415	-	-	1665	1665	1665	1665	270	900	-	290	-	135	-	-	-
		6FDA–DAM	12.5	370	-	-	-	-	-	-	-	-	-	-	-	-	-	-	-	-	-	705	-	345	-	-	-	-	-	1080	-	690	-	125	-	-	-	2645	-	1840	-	640	-	-	-	-	-	-	-
		6FDA/PMDA(1:6)–TMMDA (CH2Cl2 cast)	16	187	-	-	-	-	-	-	-	-	-	-	-	-	-	-	-	-	-	705	-	500	-	165	-	-	-	885	-	620	-	210	-	-	2010	2010	2010	1630	-	660	-	125	-	-	-	-	-
		6FDA/PMDA(1:6)–TMMDA (NMP cast)	16.4	144	-	-	-	-	-	-	-	-	-	-	-	-	-	-	-	-	-	555	-	390	-	130	-	-	120	715	-	500	-	170	-	-	1545	1545	1545	1330	-	530	-	105	-	-	-	-	-
		6FDA/PMDA(1:6)–TMMDA (DMF cast)	17.2	88.6	-	-	-	-	-	-	-	-	-	-	-	-	-	-	-	-	-	355	-	250	-	-	-	-	140	480	-	335	-	110	-	-	950	950	950	930	-	350	-	-	-	-	-	-	-
		MDI–BPA/PEG(75)	44	31	-	-	-	-	-	-	-	-	-	-	-	-	-	-	-	-	330	330	265	290	-	-	-	-	330	330	325	330	-	115	-	-	330	330	330	330	200	210	-	-	-	-	-	-	-
		MDI–BPA/PEG(80)	47	48	-	-	-	-	-	-	-	-	-	125	-	-	-	-	-	-	515	515	430	460	-	155	-	-	515	515	515	515	135	180	-	-	515	515	515	515	315	335	-	105	-	105	-	-	-
		MDI–BPA/PEG(85)	49	59	-	-	-	-	-	-	-	-	-	155	-	-	-	-	-	-	630	635	540	575	130	195	-	-	635	635	630	630	170	220	-	-	635	635	635	635	395	415	-	130	-	130	-	-	-
		L/TDI(20)–BPA/PEG(90)	51	47	-	-	-	-	-	-	-	-	-	125	-	-	-	-	-	-	505	505	435	460	110	155	-	-	505	505	505	505	140	175	-	-	505	505	505	505	315	330	-	105	-	105	-	-	-
		L/TDI(40)–BPA/PEG(85)	48	35	-	-	-	-	-	-	-	-	-	-	-	-	-	-	-	-	375	375	315	335	-	115	-	-	375	375	375	375	-	130	-	-	375	375	375	375	230	245	-	-	-	-	-	-	-
		IPA–ODA/PEO3(80)	53	58	-	-	-	-	-	-	-	-	-	155	-	105	-	-	-	-	620	620	545	575	140	190	-	-	620	620	620	620	175	220	-	-	620	620	620	620	390	410	-	130	-	130	-	-	-
		BPDA–ODA/DABA/PEO1(75)	56	2.7	-	-	-	-	-	-	-	-	-	-	-	-	-	-	-	-	-	-	-	-	-	-	-	-	-	-	-	-	-	-	-	-	-	-	-	-	-	-	-	-	-	-	-	-	-
		BPDA–mDDS/PEO1(80)	58	3.8	-	-	-	-	-	-	-	-	-	-	-	-	-	-	-	-	-	-	-	-	-	-	-	-	-	-	-	-	-	-	-	-	-	-	-	-	-	-	-	-	-	-	-	-	-
		BPDA–ODA/DABA/PEO2(70)	57	14	-	-	-	-	-	-	-	-	-	-	-	-	-	-	-	-	150	150	135	140	-	-	-	-	150	150	150	150	-	-	-	-	150	150	150	150	-	-	-	-	-	-	-	-	-
		BPDA–ODA/DABA/PEO2(80)	56	36	-	-	-	-	-	-	-	-	-	-	-	-	-	-	-	-	385	385	345	365	-	115	-	-	385	385	385	385	110	135	-	-	385	385	385	385	245	255	-	-	-	-	-	-	-
		BPDA–ODA/PEO3(75)	52	75	-	-	-	-	-	-	-	-	-	200	-	135	-	-	-	-	805	805	705	745	180	245	-	-	805	805	805	805	225	285	-	-	805	805	805	805	505	530	110	165	-	170	-	-	-
		BPDA–mDDS/PEO3(75)	53	72	-	-	-	-	-	-	-	-	-	195	-	130	-	-	-	-	770	775	680	715	175	235	-	-	770	775	770	770	220	275	-	-	775	775	775	775	485	510	105	160	-	160	-	-	-
		BPDA–mPD/PEO4(80)	54	81	-	-	-	-	-	-	-	-	-	220	-	145	-	-	-	-	870	870	770	810	205	265	-	-	870	870	870	870	250	305	-	-	870	870	870	870	550	575	120	180	-	180	-	110	-
		BPDA–ODA/PEO4(80)	51	117	-	130	-	-	-	-	-	-	115	315	-	210	-	-	-	-	1255	1255	1090	1155	275	385	-	110	1255	1255	1255	1255	350	445	-	135	1255	1255	1255	1255	785	825	175	260	-	265	-	155	-
		PMDA–ODA/DABA/PEO1(80)	52	14	-	-	-	-	-	-	-	-	-	-	-	-	-	-	-	-	150	150	130	135	-	-	-	-	150	150	150	150	-	-	-	-	150	150	150	150	-	-	-	-	-	-	-	-	-
		PMDA–ODA/PEO2(75)	54	40	-	-	-	-	-	-	-	-	-	105	-	-	-	-	-	-	430	430	380	400	-	130	-	-	430	430	430	430	120	150	-	-	430	430	430	430	270	285	-	-	-	-	-	-	-
		PMDA–mPD/PEO3(80)	50	99	-	110	-	-	-	-	-	-	-	265	-	175	-	-	-	-	1065	1065	920	970	230	325	-	-	1065	1065	1065	1065	295	375	-	115	1065	1065	1065	1065	665	695	145	220	-	225	-	135	-
		PMDA–APPS/PEO3(80)	51	159	-	180	-	-	-	-	-	-	155	430	-	285	-	-	-	-	1710	1710	1485	1570	375	525	-	155	1710	1710	1710	1710	480	605	-	185	1710	1710	1710	1710	1070	1125	235	355	-	360	-	215	-
		PMDA–APPS/PEO4(70)	53	136	-	165	-	-	-	-	-	-	145	370	-	245	-	-	-	-	1460	1460	1285	1355	335	445	-	130	1460	1460	1460	1460	415	515	-	155	1460	1460	1460	1460	920	970	205	305	-	310	-	185	-
		PMDA–mPD/PEO4(80)	52	151	-	175	-	-	-	-	-	-	155	405	-	270	-	-	-	-	1625	1625	1420	1500	365	495	-	145	1625	1625	1620	1620	460	575	-	175	1625	1625	1625	1625	1020	1070	225	340	-	340	-	205	-
		PMDA–ODA/PEO4(80)	52	167	-	195	-	-	-	-	-	-	170	450	-	300	-	-	-	-	1795	1795	1570	1655	405	550	-	160	1795	1795	1795	1795	505	635	-	190	1795	1795	1795	1795	1125	1185	250	375	-	380	-	225	-
		PMDA–pDDS/PEO4(80)	49	238	105	250	-	125	-	-	-	-	230	635	140	420	-	125	-	-	2560	2560	2190	2320	535	785	-	230	2560	2560	2560	2560	700	905	-	275	2560	2560	2560	2560	1595	1675	350	530	-	540	-	320	-
		PMDA/BTDA–BAFL (50:50)	33	43	-	-	-	-	-	-	-	-	-	-	-	-	-	-	-	-	360	460	200	335	-	125	-	-	460	460	315	420	-	155	-	-	460	460	460	460	255	280	-	-	-	-	-	-	-
		PMDA/BTDA–BAFL (90:10)	34	130	-	-	-	-	-	-	-	-	-	220	-	120	-	-	-	-	1320	1395	690	1055	125	395	-	105	1395	1395	1050	1305	140	475	-	140	1395	1395	1395	1395	795	850	-	280	-	255	-	125	-
		BPDA–BAFL/HMDA (50:50)	39	0.54	-	-	-	-	-	-	-	-	-	-	-	-	-	-	-	-	-	-	-	-	-	-	-	-	-	-	-	-	-	-	-	-	-	-	-	-	-	-	-	-	-	-	-	-	-
		PPES	34	0.92	-	-	-	-	-	-	-	-	-	-	-	-	-	-	-	-	-	-	-	-	-	-	-	-	-	-	-	-	-	-	-	-	-	-	-	-	-	-	-	-	-	-	-	-	-
		PPES/PPEK (3:1)	40	2.94	-	-	-	-	-	-	-	-	-	-	-	-	-	-	-	-	-	-	-	-	-	-	-	-	-	-	-	-	-	-	-	-	-	-	-	-	-	-	-	-	-	-	-	-	-
		PPES/PPEK (1:1)	46	4.12	-	-	-	-	-	-	-	-	-	-	-	-	-	-	-	-	-	-	-	-	-	-	-	-	-	-	-	-	-	-	-	-	-	-	-	-	-	-	-	-	-	-	-	-	-
		PPES/PPEK (1:3)	39	2.06	-	-	-	-	-	-	-	-	-	-	-	-	-	-	-	-	-	-	-	-	-	-	-	-	-	-	-	-	-	-	-	-	-	-	-	-	-	-	-	-	-	-	-	-	-
		PPES/PPEK (1:4)	34	1.77	-	-	-	-	-	-	-	-	-	-	-	-	-	-	-	-	-	-	-	-	-	-	-	-	-	-	-	-	-	-	-	-	-	-	-	-	-	-	-	-	-	-	-	-	-
		PPEK	18	0.75	-	-	-	-	-	-	-	-	-	-	-	-	-	-	-	-	-	-	-	-	-	-	-	-	-	-	-	-	-	-	-	-	-	-	-	-	-	-	-	-	-	-	-	-	-
		HQDPA–DPA/MDPA	41.2	0.957	-	-	-	-	-	-	-	-	-	-	-	-	-	-	-	-	-	-	-	-	-	-	-	-	-	-	-	-	-	-	-	-	-	-	-	-	-	-	-	-	-	-	-	-	-
		HQDPA–DPA/MDPA	15.9	2.34	-	-	-	-	-	-	-	-	-	-	-	-	-	-	-	-	-	-	-	-	-	-	-	-	-	-	-	-	-	-	-	-	-	-	-	-	-	-	-	-	-	-	-	-	-
		HQDPA–DPA/EDPA	37.6	1.34	-	-	-	-	-	-	-	-	-	-	-	-	-	-	-	-	-	-	-	-	-	-	-	-	-	-	-	-	-	-	-	-	-	-	-	-	-	-	-	-	-	-	-	-	-
		HQDPA–DPA/EDPA	15.7	3.25	-	-	-	-	-	-	-	-	-	-	-	-	-	-	-	-	-	-	-	-	-	-	-	-	-	-	-	-	-	-	-	-	-	-	-	-	-	-	-	-	-	-	-	-	-
		PI	31.7	2	-	-	-	-	-	-	-	-	-	-	-	-	-	-	-	-	-	-	-	-	-	-	-	-	-	-	-	-	-	-	-	-	-	-	-	-	-	-	-	-	-	-	-	-	-
		PI/10PS	27.4	2.33	-	-	-	-	-	-	-	-	-	-	-	-	-	-	-	-	-	-	-	-	-	-	-	-	-	-	-	-	-	-	-	-	-	-	-	-	-	-	-	-	-	-	-	-	-
		PI/15PS	25.8	2.32	-	-	-	-	-	-	-	-	-	-	-	-	-	-	-	-	-	-	-	-	-	-	-	-	-	-	-	-	-	-	-	-	-	-	-	-	-	-	-	-	-	-	-	-	-
		PI/20PS	3.19	2.9	-	-	-	-	-	-	-	-	-	-	-	-	-	-	-	-	-	-	-	-	-	-	-	-	-	-	-	-	-	-	-	-	-	-	-	-	-	-	-	-	-	-	-	-	-
		PI/25PS	4.71	4.29	-	-	-	-	-	-	-	-	-	-	-	-	-	-	-	-	-	-	-	-	-	-	-	-	-	-	-	-	-	-	-	-	-	-	-	-	-	-	-	-	-	-	-	-	-
		PI/10PSVP	28.4	3.58	-	-	-	-	-	-	-	-	-	-	-	-	-	-	-	-	-	-	-	-	-	-	-	-	-	-	-	-	-	-	-	-	-	-	-	-	-	-	-	-	-	-	-	-	-
		PI/15PSVP	26.5	3.71	-	-	-	-	-	-	-	-	-	-	-	-	-	-	-	-	-	-	-	-	-	-	-	-	-	-	-	-	-	-	-	-	-	-	-	-	-	-	-	-	-	-	-	-	-
		PI/20PSVP	38.4	5.65	-	-	-	-	-	-	-	-	-	-	-	-	-	-	-	-	-	-	-	-	-	-	-	-	-	-	-	-	-	-	-	-	-	-	-	-	-	-	-	-	-	-	-	-	-
		PI/25PSVP	4.31	6.55	-	-	-	-	-	-	-	-	-	-	-	-	-	-	-	-	-	-	-	-	-	-	-	-	-	-	-	-	-	-	-	-	-	-	-	-	-	-	-	-	-	-	-	-	-
		NTDA–BDSA(30)/CARDO/ODA	41	70	-	-	-	-	-	-	-	-	-	165	-	-	-	-	-	-	750	750	570	640	-	225	-	-	750	750	720	750	160	260	-	-	750	750	750	750	455	475	-	155	-	155	-	-	-
		NTDA–BDSA(30)/CARDO	36	164	-	125	-	-	-	-	-	-	130	310	-	175	-	-	-	-	1760	1760	1040	1395	165	515	-	140	1760	1760	1505	1700	220	605	-	180	1765	1765	1765	1765	1035	1085	120	360	-	340	-	175	-
		NTDA–BDSA(30)/BAPHF	36	23	-	-	-	-	-	-	-	-	-	-	-	-	-	-	-	-	245	245	145	195	-	-	-	-	245	245	210	235	-	-	-	-	245	245	245	245	145	150	-	-	-	-	-	-	-
		NTDA–BDSA(30)/ODA	52	5.2	-	-	-	-	-	-	-	-	-	-	-	-	-	-	-	-	-	-	-	-	-	-	-	-	-	-	-	-	-	-	-	-	-	-	-	-	-	-	-	-	-	-	-	-	-
		6FDA–FDA/HFBAPP (1/1)	23.4	465	-	230	-	110	-	-	-	-	-	530	-	320	-	-	-	-	2065	3355	995	2120	-	815	-	125	2530	5000	1310	3085	260	1245	-	240	5000	5000	5000	5000	810	2695	-	865	-	400	-	195	-
		6FDA–durene/pPDA (80/20)	13.62	230	-	-	-	-	-	-	-	-	-	-	-	-	-	-	-	-	-	625	-	370	-	-	-	-	-	810	-	535	-	150	-	-	-	2125	-	1370	-	510	-	-	-	-	-	-	-
		6FDA–durene/pPDA (50/50)	16.28	126	-	-	-	-	-	-	-	-	-	-	-	-	-	-	-	-	-	480	-	340	-	115	-	-	-	615	-	435	-	145	-	-	1355	1355	1355	1145	-	460	-	-	-	-	-	-	-
		6FDA–durene/pPDA (20/80)	21.09	59.26	-	-	-	-	-	-	-	-	-	-	-	-	-	-	-	-	220	325	-	215	-	-	-	-	275	510	125	330	-	125	-	-	635	635	635	635	-	325	-	-	-	-	-	-	-
		6FDA–durene/3,3_x0003_-DDS (75/25)	14.3	84.7	-	-	-	-	-	-	-	-	-	-	-	-	-	-	-	-	-	260	-	175	-	-	-	-	-	325	-	220	-	-	-	-	-	910	-	565	-	220	-	-	-	-	-	-	-
		6FDA–durene/3,3_x0003_-DDS (50/50)	18.2	19.8	-	-	-	-	-	-	-	-	-	-	-	-	-	-	-	-	-	-	-	-	-	-	-	-	-	120	-	-	-	-	-	-	210	210	210	210	-	-	-	-	-	-	-	-	-
		6FDA–durene/3,3_x0003_-DDS (25/75)	19.7	5.12	-	-	-	-	-	-	-	-	-	-	-	-	-	-	-	-	-	-	-	-	-	-	-	-	-	-	-	-	-	-	-	-	-	-	-	-	-	-	-	-	-	-	-	-	-
		6FDA–3,3_x0003_-DDS	22.7	1.84	-	-	-	-	-	-	-	-	-	-	-	-	-	-	-	-	-	-	-	-	-	-	-	-	-	-	-	-	-	-	-	-	-	-	-	-	-	-	-	-	-	-	-	-	-
		6FDA–6FpDA-DABA	16.9	34	-	-	-	-	-	-	-	-	-	-	-	-	-	-	-	-	-	135	-	-	-	-	-	-	-	175	-	125	-	-	-	-	365	365	365	340	-	130	-	-	-	-	-	-	-
		6FDA–6FpDA–DABA-12.5 annealed	15.7	70.8	-	-	-	-	-	-	-	-	-	-	-	-	-	-	-	-	-	260	-	185	-	-	-	-	-	325	-	225	-	-	-	-	760	760	760	590	-	235	-	-	-	-	-	-	-
		6FDA–6FpDA–DABA-12.5 (22.5% TMOS)	18.2	30.9	-	-	-	-	-	-	-	-	-	-	-	-	-	-	-	-	-	130	-	-	-	-	-	-	-	185	-	125	-	-	-	-	330	330	330	330	-	135	-	-	-	-	-	-	-
		6FDA–6FpDA–DABA-12.5 (22.5% TMOS) annealed	15.1	47.6	-	-	-	-	-	-	-	-	-	-	-	-	-	-	-	-	-	170	-	120	-	-	-	-	-	205	-	140	-	-	-	-	510	510	510	365	-	145	-	-	-	-	-	-	-
		6FDA–6FpDA–DABA-12.5 (15.0% MTMOS)	17.4	44	-	-	-	-	-	-	-	-	-	-	-	-	-	-	-	-	-	175	-	125	-	-	-	-	-	245	-	170	-	-	-	-	470	470	470	470	-	175	-	-	-	-	-	-	-
		6FDA–6FpDA–DABA-12.5 (15.0% MTMOS) annealed	15.6	110	-	-	-	-	-	-	-	-	-	-	-	-	-	-	-	-	-	405	-	285	-	-	-	-	-	495	-	345	-	120	-	-	1180	1180	1180	910	-	365	-	-	-	-	-	-	-
		6FDA–6FpDA–DABA-12.5 (15.0% PTMOS)	17.9	32.3	-	-	-	-	-	-	-	-	-	-	-	-	-	-	-	-	-	135	-	-	-	-	-	-	-	190	-	130	-	-	-	-	345	345	345	345	-	135	-	-	-	-	-	-	-
		6FDA–6FpDA–DABA-12.5 (15.0% PTMOS) annealed	16.4	91.8	-	-	-	-	-	-	-	-	-	-	-	-	-	-	-	-	-	350	-	250	-	-	-	-	-	455	-	320	-	105	-	-	985	985	985	845	-	335	-	-	-	-	-	-	-
		6FDA–6FpDA–DABA-12.5 (22.5% PTMOS)	16.3	30.7	-	-	-	-	-	-	-	-	-	-	-	-	-	-	-	-	-	115	-	-	-	-	-	-	-	150	-	105	-	-	-	-	330	330	330	280	-	110	-	-	-	-	-	-	-
		6FDA–6FpDA–DABA-12.5 (22.5% PTMOS) annealed	15.5	90.9	-	-	-	-	-	-	-	-	-	-	-	-	-	-	-	-	-	330	-	235	-	-	-	-	-	405	-	285	-	-	-	-	975	975	975	740	-	295	-	-	-	-	-	-	-
		6FDA–6FpDA–DABA-25	16.9	20.3	-	-	-	-	-	-	-	-	-	-	-	-	-	-	-	-	-	-	-	-	-	-	-	-	-	105	-	-	-	-	-	-	215	215	215	200	-	-	-	-	-	-	-	-	-
		6FDA–6FpDA–DABA-25 annealed	15.9	77.3	-	-	-	-	-	-	-	-	-	-	-	-	-	-	-	-	-	290	-	205	-	-	-	-	-	360	-	250	-	-	-	-	830	830	830	665	-	265	-	-	-	-	-	-	-
		6FDA–6FpDA–DABA-25 (22.5% TMOS)	14.8	15.7	-	-	-	-	-	-	-	-	-	-	-	-	-	-	-	-	-	-	-	-	-	-	-	-	-	-	-	-	-	-	-	-	-	165	-	115	-	-	-	-	-	-	-	-	-
		6FDA–6FpDA–DABA-25 (22.5% TMOS) annealed	16.4	79.8	-	-	-	-	-	-	-	-	-	-	-	-	-	-	-	-	-	305	-	215	-	-	-	-	-	395	-	275	-	-	-	-	855	855	855	735	-	290	-	-	-	-	-	-	-
		6FDA–6FpDA–DABA-25 (15.0% MTMOS)	15.5	16.6	-	-	-	-	-	-	-	-	-	-	-	-	-	-	-	-	-	-	-	-	-	-	-	-	-	-	-	-	-	-	-	-	175	175	175	135	-	-	-	-	-	-	-	-	-
		6FDA–6FpDA–DABA-25 (15.0% MTMOS) annealed	16	81.1	-	-	-	-	-	-	-	-	-	-	-	-	-	-	-	-	-	305	-	215	-	-	-	-	-	380	-	270	-	-	-	-	870	870	870	705	-	285	-	-	-	-	-	-	-
		6FDA–6FpDA–DABA-25 (22.5% MTMOS)	15.5	16.6	-	-	-	-	-	-	-	-	-	-	-	-	-	-	-	-	-	-	-	-	-	-	-	-	-	-	-	-	-	-	-	-	175	175	175	135	-	-	-	-	-	-	-	-	-
		6FDA–6FpDA–DABA-25 (22.5% MTMOS) annealed	15.7	60.1	-	-	-	-	-	-	-	-	-	-	-	-	-	-	-	-	-	220	-	155	-	-	-	-	-	275	-	190	-	-	-	-	645	645	645	500	-	200	-	-	-	-	-	-	-
		6FDA–6FpDA–DABA-25 (15.0% PTMOS)	19.6	18.4	-	-	-	-	-	-	-	-	-	-	-	-	-	-	-	-	-	-	-	-	-	-	-	-	-	130	-	-	-	-	-	-	195	195	195	195	-	-	-	-	-	-	-	-	-
		6FDA–6FpDA–DABA-25 (15.0% PTMOS) annealed	16.6	104	-	-	-	-	-	-	-	-	-	-	-	-	-	-	-	-	-	405	-	285	-	-	-	-	-	525	-	370	-	125	-	-	1115	1115	1115	990	-	390	-	-	-	-	-	-	-
		6FDA–6FpDA–DABA-25 (22.5% PTMOS)	19.5	19.1	-	-	-	-	-	-	-	-	-	-	-	-	-	-	-	-	-	-	-	-	-	-	-	-	-	135	-	-	-	-	-	-	205	205	205	205	-	-	-	-	-	-	-	-	-
		6FDA–6FpDA–DABA-25 (22.5% PTMOS) annealed	16.6	104	-	-	-	-	-	-	-	-	-	-	-	-	-	-	-	-	-	405	-	285	-	-	-	-	-	525	-	370	-	125	-	-	1115	1115	1115	990	-	390	-	-	-	-	-	-	-
		Poly(5:5 BPA/BN)	30.1	5.71	-	-	-	-	-	-	-	-	-	-	-	-	-	-	-	-	-	-	-	-	-	-	-	-	-	-	-	-	-	-	-	-	-	-	-	-	-	-	-	-	-	-	-	-	-
		Poly(7:3 BPA/BN)	28.9	4.62	-	-	-	-	-	-	-	-	-	-	-	-	-	-	-	-	-	-	-	-	-	-	-	-	-	-	-	-	-	-	-	-	-	-	-	-	-	-	-	-	-	-	-	-	-
	cross-linked membranes dense films	Poly(ethylene oxide-co-epichlorohydrin) (1:1) 1.1%	6.52	15	-	-	-	-	-	-	-	-	-	-	-	-	-	-	-	-	-	-	-	-	-	-	-	-	-	-	-	-	-	-	-	-	-	-	-	-	-	-	-	-	-	-	-	-	-
		Poly(ethylene oxide-co-epichlorohydrin) (1:1) 2%	14.9	14.9	-	-	-	-	-	-	-	-	-	-	-	-	-	-	-	-	-	-	-	-	-	-	-	-	-	-	-	-	-	-	-	-	-	160	-	110	-	-	-	-	-	-	-	-	-
		Poly(ethylene oxide-co-epichlorohydrin) (1:1) 5%	32.2	16.1	-	-	-	-	-	-	-	-	-	-	-	-	-	-	-	-	115	170	-	120	-	-	-	-	170	170	110	155	-	-	-	-	170	170	170	170	-	-	-	-	-	-	-	-	-
		DM14/MM9 (100/0)	68	45	-	-	-	-	-	-	-	-	-	120	-	-	-	-	-	-	480	480	450	475	125	145	-	-	480	480	480	480	145	170	-	-	480	480	480	480	315	330	-	-	-	-	-	-	-
		DM14/MM9 (100/0)	38	107	-	-	-	-	-	-	-	-	-	225	-	130	-	-	-	-	1150	1150	755	940	105	340	-	-	1150	1150	1030	1135	195	395	-	120	1150	1150	1150	1150	685	715	-	235	-	230	-	125	-
		DM14/MM9 (90/10)	69	62	-	-	-	-	-	-	-	-	140	165	-	110	-	-	-	-	665	665	625	660	175	200	-	-	665	665	665	665	205	235	-	-	665	665	665	665	435	455	-	140	-	140	-	-	-
		DM14/MM9 (90/10)	39	133	-	105	-	-	-	-	-	-	120	295	-	175	-	-	-	-	1430	1430	1000	1185	135	425	-	120	1430	1430	1320	1425	265	495	-	150	1430	1430	1430	1430	855	895	125	290	-	290	-	160	-
		DM14/MM9 (70/30)	66	96	-	135	-	-	-	-	-	-	210	260	-	175	-	-	-	-	1030	1030	960	1010	270	315	-	-	1030	1030	1030	1030	315	370	-	105	1030	1030	1030	1030	670	705	145	215	-	220	-	130	-
		DM14/MM9 (70/30)	36	195	-	150	-	-	-	-	-	-	155	370	-	205	-	-	-	-	2095	2095	1235	1660	195	610	-	165	2095	2095	1790	2025	265	720	-	215	2095	2095	2095	2095	1230	1295	145	425	-	405	-	210	-
		DM14/MM9 (50/50)	64	144	-	205	-	125	-	-	-	-	305	390	110	260	-	-	-	-	1550	1550	1435	1510	405	470	-	135	1550	1550	1545	1550	470	555	-	165	1550	1550	1550	1550	1000	1050	220	325	-	330	-	195	-
		DM14/MM9 (50/50)	36	260	-	200	-	120	-	-	-	-	210	495	-	275	-	-	-	-	2795	2795	1650	2210	260	815	-	220	2795	2795	2385	2700	350	960	-	285	2795	2795	2795	2795	1640	1725	195	570	-	540	-	285	-
		DM14/MM9 (30/70)	63	210	110	295	-	180	-	-	-	-	435	575	150	385	-	135	-	-	2260	2260	2080	2195	590	690	-	200	2260	2260	2260	2260	680	805	105	240	2260	2260	2260	2260	1455	1535	325	475	-	480	-	290	-
		DM14/MM9 (30/70)	33	350	-	260	-	150	-	-	-	-	240	550	-	320	-	-	-	-	2950	3765	1635	2760	340	1050	-	265	3765	3765	2575	3445	385	1270	-	370	3765	3765	3765	3765	2095	2280	155	760	-	660	-	300	-
		DB30/MM9 (100/0)	63	93	-	130	-	-	-	-	-	-	190	255	-	170	-	-	-	-	1000	1000	920	970	260	305	-	-	1000	1000	1000	1000	300	355	-	105	1000	1000	1000	1000	645	675	140	210	-	210	-	125	-
		DB30/MM9 (100/0)	35	200	-	150	-	-	-	-	-	-	155	365	-	195	-	-	-	-	2150	2150	1205	1675	200	625	-	165	2150	2150	1790	2055	220	735	-	220	2150	2150	2150	2150	1255	1320	120	435	-	410	-	210	-
		DB30/MM9 (90/10)	64	105	-	150	-	-	-	-	-	-	225	285	-	190	-	-	-	-	1130	1130	1045	1100	295	345	-	-	1130	1130	1130	1130	340	400	-	120	1130	1130	1130	1130	730	765	160	235	-	240	-	140	-
		DB30/MM9 (90/10)	36	210	-	160	-	-	-	-	-	-	170	400	-	225	-	-	-	-	2255	2255	1330	1785	210	660	-	180	2255	2255	1925	2180	285	775	-	230	2260	2260	2260	2260	1325	1395	155	460	-	435	-	230	-
		DB30/MM9 (70/30)	67	141	-	200	-	125	-	-	-	-	315	380	120	255	-	-	-	-	1515	1515	1420	1495	400	460	-	135	1515	1515	1515	1515	465	540	-	160	1515	1515	1515	1515	985	1035	215	320	-	320	-	190	-
		DB30/MM9 (70/30)	35	270	-	205	-	120	-	-	-	-	215	490	-	260	-	-	-	-	2900	2905	1630	2260	270	840	-	225	2905	2905	2420	2775	300	995	-	295	2905	2905	2905	2905	1695	1780	165	590	-	550	-	285	-
		DB30/MM9 (50/50)	62	179	-	250	-	150	-	-	-	-	360	490	125	325	-	115	-	-	1925	1925	1765	1860	500	585	-	170	1925	1925	1925	1925	580	685	-	205	1925	1925	1925	1925	1240	1305	275	405	-	410	-	245	-
		DB30/MM9 (50/50)	34	330	-	250	-	145	-	-	-	-	250	555	-	310	-	-	-	-	3360	3550	1760	2680	325	1010	-	265	3550	3550	2665	3320	365	1205	-	355	3550	3550	3550	3550	2020	2165	170	720	-	645	-	315	-
		DB30/MM9 (30/70)	60	250	130	345	-	205	-	-	-	-	480	685	160	455	-	160	-	-	2690	2690	2450	2580	690	820	-	240	2690	2690	2690	2690	805	960	120	285	2690	2690	2690	2690	1720	1815	385	565	-	575	-	345	-
		DB30/MM9 (30/70)	33	410	-	305	-	180	-	-	-	-	280	645	-	375	-	-	-	-	3455	4410	1915	3235	400	1230	-	315	4410	4410	3020	4035	450	1490	-	435	4410	4410	4410	4410	2455	2670	185	890	-	775	-	355	-
		DM9/MM9 (90/10)	68	18.3	-	-	-	-	-	-	-	-	-	-	-	-	-	-	-	-	195	195	185	190	-	-	-	-	195	195	195	195	-	-	-	-	195	195	195	195	125	135	-	-	-	-	-	-	-
		DM9/MM9 (90/10)	38	51	-	-	-	-	-	-	-	-	-	105	-	-	-	-	-	-	545	545	360	445	-	160	-	-	545	545	490	540	-	190	-	-	545	545	545	545	325	340	-	110	-	110	-	-	-
		DM23/MM9 (90/10)	66	145	-	205	-	130	-	-	-	-	320	395	115	265	-	-	-	-	1560	1560	1455	1530	410	475	-	135	1560	1560	1560	1560	475	555	-	165	1560	1560	1560	1560	1010	1065	225	325	-	330	-	200	-
		DM23/MM9 (90/10)	38	290	-	225	-	135	-	-	-	-	255	615	115	360	-	-	-	-	3120	3120	2055	2545	290	925	-	255	3120	3120	2800	3075	525	1080	-	325	3120	3120	3120	3120	1855	1945	250	640	-	625	-	340	-
		DB10/MM9 (90/10)	61	6.7	-	-	-	-	-	-	-	-	-	-	-	-	-	-	-	-	-	-	-	-	-	-	-	-	-	-	-	-	-	-	-	-	-	-	-	-	-	-	-	-	-	-	-	-	-
		DB10/MM9 (90/10)	34	27	-	-	-	-	-	-	-	-	-	-	-	-	-	-	-	-	275	290	140	215	-	-	-	-	290	290	215	270	-	-	-	-	290	290	290	290	165	175	-	-	-	-	-	-	-
		DB69/MM9 (90/10) (cooling)	56	240	120	315	-	175	-	-	-	-	370	655	150	440	-	145	-	-	2580	2580	2305	2435	630	790	-	230	2580	2580	2580	2580	755	915	-	275	2580	2580	2580	2580	1640	1725	365	540	-	545	-	325	-
		DB69/MM9 (90/10) (cooling)	36	510	-	395	-	235	-	-	-	-	415	975	160	545	-	130	-	-	5485	5485	3240	4340	510	1605	-	435	5485	5485	4685	5300	695	1885	-	565	5485	5485	5485	5485	3220	3385	385	1120	-	1060	-	555	-
		DB69/MM9 (90/10) (heating)	62	98	-	135	-	-	-	-	-	-	195	265	-	180	-	-	-	-	1050	1055	965	1020	270	320	-	-	1055	1055	1050	1050	315	375	-	110	1055	1055	1055	1055	675	715	150	220	-	225	-	135	-
		DB69/MM9 (90/10) (heating)	35	400	-	305	-	180	-	-	-	-	315	730	110	390	-	-	-	-	4300	4300	2415	3350	400	1250	-	335	4300	4300	3585	4115	445	1470	-	440	4300	4305	4300	4300	2510	2640	245	875	-	820	-	420	-
		DM14/MM23 (30/70) (cooling)	62	240	125	335	-	200	-	-	-	-	485	655	165	440	-	155	-	-	2580	2580	2370	2500	670	790	-	230	2580	2580	2580	2580	780	920	120	275	2580	2580	2580	2580	1660	1750	370	540	-	550	-	330	-
		DM14/MM23 (30/70) (cooling)	35	420	-	320	-	190	-	-	-	-	335	765	115	410	-	105	-	-	4515	4515	2535	3520	420	1310	-	350	4515	4515	3765	4320	470	1545	-	460	4520	4520	4520	4520	2635	2775	255	920	-	860	-	440	-
		DM14/MM23 (30/70) (heating)	62	250	130	350	-	210	-	-	-	-	505	685	175	455	-	160	-	-	2690	2690	2470	2600	695	820	-	240	2690	2690	2690	2690	810	960	125	285	2690	2690	2690	2690	1730	1820	385	565	-	575	-	345	-
		Matrimid 5218	25.6	6.5	-	-	-	-	-	-	-	-	-	-	-	-	-	-	-	-	-	-	-	-	-	-	-	-	-	-	-	-	-	-	-	-	-	-	-	-	-	-	-	-	-	-	-	-	-
		Matrimid 5218, 1 day cross-linking	25.6	7.4	-	-	-	-	-	-	-	-	-	-	-	-	-	-	-	-	-	-	-	-	-	-	-	-	-	-	-	-	-	-	-	-	-	-	-	-	-	-	-	-	-	-	-	-	-
		Matrimid 5218, 3 days cross-linking	25.2	6	-	-	-	-	-	-	-	-	-	-	-	-	-	-	-	-	-	-	-	-	-	-	-	-	-	-	-	-	-	-	-	-	-	-	-	-	-	-	-	-	-	-	-	-	-
		Matrimid 5218, 7 days cross-linking	24.6	5.1	-	-	-	-	-	-	-	-	-	-	-	-	-	-	-	-	-	-	-	-	-	-	-	-	-	-	-	-	-	-	-	-	-	-	-	-	-	-	-	-	-	-	-	-	-
		Matrimid 5218, 14 days cross-linking	24.1	4.7	-	-	-	-	-	-	-	-	-	-	-	-	-	-	-	-	-	-	-	-	-	-	-	-	-	-	-	-	-	-	-	-	-	-	-	-	-	-	-	-	-	-	-	-	-
		Matrimid 5218, 21 days cross-linking	22.2	3.4	-	-	-	-	-	-	-	-	-	-	-	-	-	-	-	-	-	-	-	-	-	-	-	-	-	-	-	-	-	-	-	-	-	-	-	-	-	-	-	-	-	-	-	-	-
		Matrimid 5218, 32 days cross-linking	15	1.9	-	-	-	-	-	-	-	-	-	-	-	-	-	-	-	-	-	-	-	-	-	-	-	-	-	-	-	-	-	-	-	-	-	-	-	-	-	-	-	-	-	-	-	-	-
		6FDA–durene, 5 min cross-linked	12.3	136	-	-	-	-	-	-	-	-	-	-	-	-	-	-	-	-	-	240	-	110	-	-	-	-	-	385	-	245	-	-	-	-	-	930	-	650	-	225	-	-	-	-	-	-	-
		6FDA–durene, 10 min cross-linked	14.1	91.8	-	-	-	-	-	-	-	-	-	-	-	-	-	-	-	-	-	270	-	175	-	-	-	-	-	345	-	230	-	-	-	-	-	970	-	590	-	225	-	-	-	-	-	-	-
		6FDA–durene, 15 min cross-linked	11.6	70	-	-	-	-	-	-	-	-	-	-	-	-	-	-	-	-	-	-	-	-	-	-	-	-	-	175	-	105	-	-	-	-	-	420	-	300	-	-	-	-	-	-	-	-	-
		6FDA–durene, 30 min cross-linked	10.6	30.3	-	-	-	-	-	-	-	-	-	-	-	-	-	-	-	-	-	-	-	-	-	-	-	-	-	-	-	-	-	-	-	-	-	155	-	110	-	-	-	-	-	-	-	-	-
		6FDA–durene, 60 min cross-linked	5.35	2.14	-	-	-	-	-	-	-	-	-	-	-	-	-	-	-	-	-	-	-	-	-	-	-	-	-	-	-	-	-	-	-	-	-	-	-	-	-	-	-	-	-	-	-	-	-
	Poly(phenyl oxide)	Poly(phenyl oxide)	14.4	61	-	-	-	-	-	-	-	-	-	-	-	-	-	-	-	-	-	190	-	130	-	-	-	-	-	235	-	165	-	-	-	-	-	655	-	415	-	160	-	-	-	-	-	-	-
		Poly(phenyl oxide) - Nylon(20%)	16.15	24.8	-	-	-	-	-	-	-	-	-	-	-	-	-	-	-	-	-	-	-	-	-	-	-	-	-	115	-	-	-	-	-	-	265	265	265	220	-	-	-	-	-	-	-	-	-
		Poly(phenyl oxide) - Nylon(20%) with PSMA (2wt%) as compatibilizer	38.7	12	-	-	-	-	-	-	-	-	-	-	-	-	-	-	-	-	125	125	-	105	-	-	-	-	125	125	115	125	-	-	-	-	125	125	125	125	-	-	-	-	-	-	-	-	-
		Poly(phenyl oxide) - Nylon(20%) with PSMA (4wt%) as compatibilizer	35.87	17	-	-	-	-	-	-	-	-	-	-	-	-	-	-	-	-	180	180	105	140	-	-	-	-	180	180	155	175	-	-	-	-	180	180	180	180	105	110	-	-	-	-	-	-	-
		Poly(phenyl oxide) - Nylon(20%) with PSMA (6wt%) as compatibilizer	27.43	12.9	-	-	-	-	-	-	-	-	-	-	-	-	-	-	-	-	-	135	-	-	-	-	-	-	-	135	-	105	-	-	-	-	135	135	135	135	-	-	-	-	-	-	-	-	-
	Polyvinyl acetate	Polyvinyl acetate	34.7	3.1	-	-	-	-	-	-	-	-	-	-	-	-	-	-	-	-	-	-	-	-	-	-	-	-	-	-	-	-	-	-	-	-	-	-	-	-	-	-	-	-	-	-	-	-	-
		Polyvinyl acetate with 15pph Zeolite 4A	30.7	2.4	-	-	-	-	-	-	-	-	-	-	-	-	-	-	-	-	-	-	-	-	-	-	-	-	-	-	-	-	-	-	-	-	-	-	-	-	-	-	-	-	-	-	-	-	-
		Polyvinyl acetate with 20pph Zeolite KFI	53.6	4.9	-	-	-	-	-	-	-	-	-	-	-	-	-	-	-	-	-	-	-	-	-	-	-	-	-	-	-	-	-	-	-	-	-	-	-	-	-	-	-	-	-	-	-	-	-
		Polyvinyl acetate with 15pph Zeolite H-ZK-5	41	4.9	-	-	-	-	-	-	-	-	-	-	-	-	-	-	-	-	-	-	-	-	-	-	-	-	-	-	-	-	-	-	-	-	-	-	-	-	-	-	-	-	-	-	-	-	-
		Polyvinyl acetate with 15pph Zeolite Na-SSZ-13	41.7	4.5	-	-	-	-	-	-	-	-	-	-	-	-	-	-	-	-	-	-	-	-	-	-	-	-	-	-	-	-	-	-	-	-	-	-	-	-	-	-	-	-	-	-	-	-	-
		Polyvinyl acetate with 15pph Zeolite SAPO-34	44.4	4.4	-	-	-	-	-	-	-	-	-	-	-	-	-	-	-	-	-	-	-	-	-	-	-	-	-	-	-	-	-	-	-	-	-	-	-	-	-	-	-	-	-	-	-	-	-
		Polyvinyl acetate with 15pph Zeolite SAPO-44	51.8	4.9	-	-	-	-	-	-	-	-	-	-	-	-	-	-	-	-	-	-	-	-	-	-	-	-	-	-	-	-	-	-	-	-	-	-	-	-	-	-	-	-	-	-	-	-	-
	Silicone Rubber	Silicone Rubber	11	14.3	-	-	-	-	-	-	-	-	-	-	-	-	-	-	-	-	-	-	-	-	-	-	-	-	-	-	-	-	-	-	-	-	-	-	-	-	-	-	-	-	-	-	-	-	-
		Silicone Rubber with Polyethylene Glycol particules	42	4.89	-	-	-	-	-	-	-	-	-	-	-	-	-	-	-	-	-	-	-	-	-	-	-	-	-	-	-	-	-	-	-	-	-	-	-	-	-	-	-	-	-	-	-	-	-
		Silicone Rubber with Activated Carbon particules	15	29.4	-	-	-	-	-	-	-	-	-	-	-	-	-	-	-	-	-	105	-	-	-	-	-	-	-	125	-	-	-	-	-	-	215	315	-	225	-	-	-	-	-	-	-	-	-
		Silicone Rubber with Polyethylene Glycol and Activated Carbon particules	47	24.2	-	-	-	-	-	-	-	-	-	-	-	-	-	-	-	-	260	260	215	230	-	-	-	-	260	260	260	260	-	-	-	-	260	260	260	260	160	165	-	-	-	-	-	-	-
		Silicone Rubber with Activated Carbon and Carbonate particules	20.1	16.2	-	-	-	-	-	-	-	-	-	-	-	-	-	-	-	-	-	-	-	-	-	-	-	-	-	125	-	-	-	-	-	-	170	170	170	170	-	-	-	-	-	-	-	-	-
		Silicone Rubber with PEG + Activated Carbon and Carbonate particules	40.5	14.3	-	-	-	-	-	-	-	-	-	-	-	-	-	-	-	-	150	150	115	130	-	-	-	-	150	150	145	150	-	-	-	-	150	150	150	150	-	-	-	-	-	-	-	-	-
	Polysulfone	Polysulfone	24.8	4.46	-	-	-	-	-	-	-	-	-	-	-	-	-	-	-	-	-	-	-	-	-	-	-	-	-	-	-	-	-	-	-	-	-	-	-	-	-	-	-	-	-	-	-	-	-
		MCM41/Polysulfone	25.3	7.59	-	-	-	-	-	-	-	-	-	-	-	-	-	-	-	-	-	-	-	-	-	-	-	-	-	-	-	-	-	-	-	-	-	-	-	-	-	-	-	-	-	-	-	-	-
		MCM41/Polysulfone with Mesoporous silica 30%wt additive	23.4	22.93	-	-	-	-	-	-	-	-	-	-	-	-	-	-	-	-	-	165	-	-	-	-	-	-	120	245	-	150	-	-	-	-	245	245	245	245	-	130	-	-	-	-	-	-	-
		Amine-MCM41/Polysulfone with Mesoporous silica 20%wt additive	29	7.25	-	-	-	-	-	-	-	-	-	-	-	-	-	-	-	-	-	-	-	-	-	-	-	-	-	-	-	-	-	-	-	-	-	-	-	-	-	-	-	-	-	-	-	-	-
		MCM48/Polysulfone with Mesoporous silica 10%wt additive	26.4	8.45	-	-	-	-	-	-	-	-	-	-	-	-	-	-	-	-	-	-	-	-	-	-	-	-	-	-	-	-	-	-	-	-	-	-	-	-	-	-	-	-	-	-	-	-	-
		MCM48/Polysulfone with Mesoporous silica 20%wt additive	23.6	18.21	-	-	-	-	-	-	-	-	-	-	-	-	-	-	-	-	-	135	-	-	-	-	-	-	-	195	-	120	-	-	-	-	195	195	195	195	-	105	-	-	-	-	-	-	-
[truncated: 3 more columns]
